# Supplementary material for: KATANIN-dependent mechanical properties of the stigmatic cell wall mediate the pollen tube path in Arabidopsis
Source: eLife. 2020 Sep 1;9:e57282. doi: 10.7554/eLife.57282 (PMC7462616; doi:10.7554/eLife.57282)
Supplement: Figure 1—source data 1. [file elife-57282-fig1-data1.xlsx]

## Sheet: Figure 1D
Figure 1D–Source Data 1
Fig1D_MicrotubulesOrganisation
stages	replicates	anisotropy
S12	R1	0.4337
S12	R1	0.4022
S12	R1	0.468
S12	R1	0.3542
S12	R1	0.4271
S12	R1	0.3125
S12	R1	0.3098
S12	R1	0.3559
S12	R1	0.3336
S12	R1	0.3484
S12	R1	0.5147
S12	R1	0.3062
S12	R1	0.3481
S12	R1	0.311
S12	R1	0.3737
S12	R1	0.3569
S12	R1	0.3258
S12	R1	0.3076
S12	R1	0.4037
S12	R1	0.347
S12	R1	0.5145
S12	R1	0.3697
S12	R1	0.4502
S12	R2	0.4292
S12	R2	0.4237
S12	R2	0.4728
S12	R2	0.4417
S12	R2	0.4181
S12	R2	0.452
S12	R2	0.367
S12	R2	0.3688
S12	R2	0.4676
S12	R2	0.4219
S12	R2	0.4332
S12	R2	0.4353
S12	R2	0.4277
S12	R2	0.5029
S12	R2	0.4795
S12	R2	0.4073
S12	R2	0.3383
S12	R2	0.31
S12	R2	0.47
S12	R2	0.3904
S12	R3	0.5117
S12	R3	0.4051
S12	R3	0.3585
S12	R3	0.3475
S12	R3	0.4741
S12	R3	0.4107
S12	R3	0.445
S12	R3	0.3432
S12	R3	0.3732
S12	R3	0.5506
S12	R3	0.4782
S12	R3	0.3513
S12	R3	0.4751
S12	R3	0.3596
S12	R3	0.3736
S12	R3	0.3115
S12	R3	0.3513
S12	R3	0.4995
S13	R1	0.3046
S13	R1	0.3562
S13	R1	0.3448
S13	R1	0.4233
S13	R1	0.4474
S13	R1	0.326
S13	R1	0.2692
S13	R1	0.4219
S13	R1	0.2103
S13	R1	0.1855
S13	R1	0.3825
S13	R1	0.4096
S13	R1	0.392
S13	R1	0.4087
S13	R1	0.3611
S13	R1	0.4264
S13	R1	0.3198
S13	R1	0.3435
S13	R1	0.252
S13	R1	0.3719
S13	R1	0.4789
S13	R1	0.4139
S13	R1	0.3945
S13	R1	0.4309
S13	R1	0.437
S13	R1	0.3297
S13	R1	0.3096
S13	R1	0.3466
S13	R1	0.327
S13	R1	0.3447
S13	R1	0.3047
S13	R1	0.365
S13	R1	0.4002
S13	R2	0.3824
S13	R2	0.3234
S13	R2	0.3632
S13	R2	0.3272
S13	R2	0.3
S13	R2	0.2911
S13	R2	0.3261
S13	R2	0.335
S13	R2	0.3489
S13	R2	0.3324
S13	R2	0.3971
S13	R3	0.3567
S13	R3	0.4441
S13	R3	0.4168
S13	R3	0.3495
S13	R3	0.4557
S13	R3	0.3738
S13	R3	0.2554
S13	R3	0.3373
S13	R3	0.3977
S13	R3	0.3302
S13	R3	0.3386
S13	R3	0.362
S13	R3	0.2435
S13	R3	0.3364
S13	R3	0.2985
S13	R3	0.3929
S14	R1	0.1723
S14	R1	0.2611
S14	R1	0.1623
S14	R1	0.1954
S14	R1	0.3482
S14	R1	0.4306
S14	R1	0.2205
S14	R1	0.2623
S14	R1	0.2698
S14	R1	0.3106
S14	R1	0.3516
S14	R1	0.1611
S14	R1	0.1169
S14	R1	0.2497
S14	R1	0.1834
S14	R1	0.355
S14	R1	0.3015
S14	R1	0.2384
S14	R1	0.3035
S14	R1	0.2241
S14	R1	0.2183
S14	R1	0.2065
S14	R1	0.2931
S14	R1	0.3421
S14	R1	0.1121
S14	R1	0.202
S14	R1	0.2056
S14	R1	0.3068
S14	R1	0.2222
S14	R1	0.2037
S14	R1	0.1937
S14	R1	0.1871
S14	R1	0.1726
S14	R1	0.2046
S14	R1	0.1321
S14	R2	0.1723
S14	R2	0.1816
S14	R2	0.191
S14	R2	0.1826
S14	R2	0.4011
S14	R2	0.377
S14	R2	0.3818
S14	R2	0.1863
S14	R2	0.2393
S14	R2	0.2053
S14	R2	0.1652
S14	R2	0.1946
S14	R2	0.0661
S14	R2	0.0915
S14	R2	0.1928
S14	R2	0.128
S14	R2	0.2709
S14	R2	0.1549
S14	R2	0.0966
S14	R2	0.2824
S14	R2	0.3069
S14	R2	0.3431
S14	R2	0.2668
S14	R2	0.1811
S14	R2	0.219
S14	R3	0.2283
S14	R3	0.2727
S14	R3	0.3537
S14	R3	0.158
S14	R3	0.1967
S14	R3	0.1454
S14	R3	0.1912
S14	R3	0.1766
S14	R3	0.2132
S14	R3	0.1525
S14	R3	0.1287
S14	R3	0.0654
S14	R3	0.138
S14	R3	0.1633
S14	R3	0.2411
S15	R1	0.1121
S15	R1	0.0813
S15	R1	0.093
S15	R1	0.1187
S15	R1	0.043
S15	R1	0.065
S15	R1	0.0585
S15	R1	0.032
S15	R1	0.0819
S15	R1	0.096
S15	R1	0.1247
S15	R1	0.0581
S15	R1	0.0432
S15	R1	0.0854
S15	R1	0.0803
S15	R1	0.0264
S15	R1	0.0866
S15	R1	0.0522
S15	R2	0.0065
S15	R2	0.0422
S15	R2	0.0226
S15	R2	0.0513
S15	R2	0.0397
S15	R2	0.0705
S15	R2	0.0806
S15	R2	0.0612
S15	R2	0.0655
S15	R2	0.0275
S15	R2	0.0233
S15	R2	0.11
S15	R2	0.1546
S15	R2	0.0968
S15	R2	0.1608
S15	R2	0.1278
S15	R2	0.0571
S15	R2	0.1051
S15	R2	0.11
S15	R2	0.0396
S15	R2	0.0363
S15	R2	0.0589
S15	R2	0.1715
S15	R2	0.2463
S15	R2	0.1668
S15	R2	0.0569
S15	R2	0.0939
S15	R2	0.1302
S15	R2	0.2471
S15	R2	0.0833
S15	R2	0.1006
S15	R2	0.075
S15	R2	0.1016
S15	R2	0.0561
S15	R2	0.1255
S15	R2	0.2164
S15	R2	0.0811
S15	R2	0.1111
S15	R2	0.0325
S15	R3	0.0516
S15	R3	0.0272
S15	R3	0.053
S15	R3	0.1565
S15	R3	0.0247
S15	R3	0.0274
S15	R3	0.0399
S15	R3	0.0877
S15	R3	0.0979
S15	R3	0.1237
S15	R3	0.095
S15	R3	0.0512
S15	R3	0.163
S15	R3	0.1178
S15	R3	0.1771
