# Supplementary material for: KATANIN-dependent mechanical properties of the stigmatic cell wall mediate the pollen tube path in Arabidopsis
Source: eLife. 2020 Sep 1;9:e57282. doi: 10.7554/eLife.57282 (PMC7462616; doi:10.7554/eLife.57282)
Supplement: Figure 2—source data 1. [file elife-57282-fig2-data1.xlsx]

## Sheet: Figure 2B
Figure 2B–Source Data 1
Fig2B_Col0_TurnNumber
				Straight	1/2L	1L	2L	<2L	npapilles	nstigmates
Col-0 x Col-0	R1	S12	mean	0.472222	0.333333	0.194444	0	0	46	6
			SEM	0.0535411	0.0218673	0.0416667	0	0
	R1	S13	mean	0.627451	0.333333	0.0196078	0.0196078	0	51	6
			SEM	0.0504964	0.0325062	0.0277778	0.0208333	0
	R1	S14	mean	0.390625	0.296875	0.25	0.03125	0.03125	64	6
			SEM	0.0752688	0.0349498	0.0490274	0.015873	0.025641
	R1	S15	mean	0.157895	0.263158	0.473684	0	0.105263	38	5
			SEM	0.0931315	0.0364952	0.113611	0	0.0494214
	R2	S12	mean	0.472222	0.333333	0.194444	0	0	36	5
			SEM	0.0886041	0.0428571	0.0595886	0	0
	R2	S13	mean	0.526316	0.350877	0.105263	0.0175439	0	57	6
			SEM	0.0622886	0.0576844	0.0257357	0.0128205	0
	R2	S14	mean	0.184615	0.323077	0.430769	0.0615385	0	65	7
			SEM	0.0360065	0.0324388	0.023215	0.0266867	0
	R2	S15	mean	0.181818	0.19697	0.348485	0.19697	0.0757576	66	7
			SEM	0.0298953	0.0673996	0.0471054	0.0394666	0.0383179
	R3	S12	mean	0.655914	0.268817	0.0752688	0	0	93	11
			SEM	0.0468862	0.0399256	0.0255989	0	0
	R3	S13	mean	0.607143	0.261905	0.130952	0	0	84	8
			SEM	0.0792696	0.0569366	0.0318759	0	0
	R3	S14	mean	0.216216	0.418919	0.324324	0.027027	0.0135135	74	7
			SEM	0.0498741	0.0394364	0.0556015	0.0160888	0.0204082
	R3	S15	mean	0.164384	0.369863	0.383562	0.0547945	0.0273973	73	5
			SEM	0.0823446	0.0637837	0.125432	0.0168007	0.0214761
	R4	S12	mean	0.611111	0.277778	0.111111	0	0	18	3
			SEM	0.0275644	0.0896378	0.0833333	0	0
	R4	S13	mean	0.551724	0.344828	0.0689655	0.0344828	0	29	3
			SEM	0.113008	0.0827345	0.0666667	0.0333333	0
	R4	S14	mean	0.405405	0.378378	0.216216	0	0	37	4
			SEM	0.104729	0.0359922	0.104167	0	0
	R4	S15	mean	0.238095	0.238095	0.285714	0.190476	0.047619	21	3
			SEM	0.0949699	0.0977061	0.0745736	0.145297	0.047619
Col0	S12					S13
	Straight	1/2L	1L	2L	<2L	Straight	1/2L	1L	2L	<2L
mean	63.7306	26.943	9.32642	0	0	58.371	31.2217	9.04977	1.35747	0
SEM	3.4915	2.31685	2.33012	0	0	3.71443	2.91769	1.73836	0.738265	0
	S14					S15
	Straight	1/2L	1L	2L	<2L	Straight	1/2L	1L	2L	<2L
mean	28.3333	35.4167	31.6667	3.33333	1.25	17.6768	27.7778	37.8788	10.6061	6.06061
SEM	3.32411	2.02554	2.85082	0.992452	0.838309	3.34282	3.32649	4.55836	3.18165	1.99431
