# Supplementary material for: KATANIN-dependent mechanical properties of the stigmatic cell wall mediate the pollen tube path in Arabidopsis
Source: eLife. 2020 Sep 1;9:e57282. doi: 10.7554/eLife.57282 (PMC7462616; doi:10.7554/eLife.57282)
Supplement: Figure 4—source data 1. [file elife-57282-fig4-data1.xlsx]

## Sheet: Figure 4C
Figure 4C–Source Data 1
Fig4C_OryzalinTreatment	proportion
		Straight	Half L	1L	2L	>2L
DMSO treatment		0.636364	0.272727	0.0909091	0	0
		0.8	0.2	0	0	0
		0.5	0.333333	0.166667	0	0
		1	0	0	0	0
		0.5	0.5	0	0	0
		0.666667	0.333333	0	0	0
		0.52381	0.333333	0.142857	0	0
		0.6	0.266667	0.133333	0	0
		0.6	0.333333	0.0666667	0	0
		0.666667	0.333333	0	0	0
		0.545455	0.272727	0.181818	0	0
		0.666667	0.333333	0	0	0
		0.642136	0.292677	0.0651876	0	0
	ecart type	0.142105	0.116237	0.0743074	0	0
	sem	0.0410221	0.0335548	0.0214507	0	0
Oryzalin treatment		0.285714	0.142857	0.428571	0.142857	0
		0.5	0.166667	0.166667	0.166667	0
		0.444444	0.111111	0.444444	0	0
		0.333333	0.333333	0.333333	0	0
		0.428571	0.142857	0.428571	0	0
		0.181818	0.272727	0.454545	0.0909091	0
		0.363636	0.227273	0.409091	0	0
		0.428571	0.238095	0.285714	0	0.047619
		0.375	0.375	0.25	0	0
		0.428571	0.285714	0.285714	0	0
		0.5	0	0.5	0	0
		0.3125	0.375	0.3125	0	0
		0.571429	0.142857	0.142857	0.142857	0
		0.333333	0.555556	0.111111	0	0
		0.25	0.25	0.5	0	0
		0.285714	0.428571	0.285714	0	0
		0.376415	0.252976	0.333677	0.0339556	0.00297619
	ecart type	0.10316	0.138787	0.124925	0.0624024	0.0119048
	sem	0.02579	0.0346968	0.0312313	0.0156006	0.00297619
