# Supplementary material for: KATANIN-dependent mechanical properties of the stigmatic cell wall mediate the pollen tube path in Arabidopsis
Source: eLife. 2020 Sep 1;9:e57282. doi: 10.7554/eLife.57282 (PMC7462616; doi:10.7554/eLife.57282)
Supplement: Figure 5—source data 1. [file elife-57282-fig5-data1.xlsx]

## Sheet: Figure 5C 
Figure 5C–Source Data 1
Fig4C_MicrotubulesOrganisationKtn
Genotypes	Replicates	Anisotropy
MAP65/Col-0	R1	0.4132
MAP65/Col-0	R1	0.3669
MAP65/Col-0	R1	0.3871
MAP65/Col-0	R1	0.4084
MAP65/Col-0	R1	0.362
MAP65/Col-0	R1	0.3666
MAP65/Col-0	R1	0.2528
MAP65/Col-0	R1	0.211
MAP65/Col-0	R1	0.2772
MAP65/Col-0	R1	0.3522
MAP65/Col-0	R1	0.3575
MAP65/Col-0	R1	0.1736
MAP65/Col-0	R1	0.2372
MAP65/Col-0	R1	0.2622
MAP65/Col-0	R1	0.2731
MAP65/Col-0	R1	0.3445
MAP65/Col-0	R1	0.2482
MAP65/Col-0	R1	0.1649
MAP65/Col-0	R1	0.1692
MAP65/Col-0	R1	0.2436
MAP65/Col-0	R1	0.2944
MAP65/Col-0	R1	0.2048
MAP65/Col-0	R1	0.2999
MAP65/Col-0	R1	0.4626
MAP65/ktn1	R1	0.1787
MAP65/ktn1	R1	0.147
MAP65/ktn1	R1	0.1722
MAP65/ktn1	R1	0.2088
MAP65/ktn1	R1	0.1599
MAP65/ktn1	R1	0.2003
MAP65/ktn1	R1	0.1966
MAP65/ktn1	R1	0.0997
MAP65/ktn1	R1	0.0675
MAP65/ktn1	R1	0.1302
MAP65/ktn1	R1	0.0403
MAP65/ktn1	R1	0.1212
MAP65/ktn1	R1	0.199
MAP65/ktn1	R1	0.1842
MAP65/ktn1	R1	0.0939
MAP65/ktn1	R1	0.1846
MAP65/ktn1	R1	0.1917
MAP65/ktn1	R1	0.0527
MAP65/ktn1	R1	0.0438
MAP65/ktn1	R1	0.2057
MAP65/ktn1	R1	0.0553
MAP65/ktn1	R1	0.0937
MAP65/ktn1	R1	0.1991
MAP65/ktn1	R1	0.121
MAP65/ktn1	R1	0.2122
MAP65/Col-0	R2	0.4083
MAP65/Col-0	R2	0.3204
MAP65/Col-0	R2	0.3666
MAP65/Col-0	R2	0.325
MAP65/Col-0	R2	0.3001
MAP65/Col-0	R2	0.2764
MAP65/Col-0	R2	0.2472
MAP65/Col-0	R2	0.2893
MAP65/Col-0	R2	0.4923
MAP65/Col-0	R2	0.295
MAP65/Col-0	R2	0.3841
MAP65/Col-0	R2	0.3073
MAP65/Col-0	R2	0.3468
MAP65/Col-0	R2	0.3323
MAP65/Col-0	R2	0.3596
MAP65/Col-0	R2	0.4006
MAP65/Col-0	R2	0.3079
MAP65/Col-0	R2	0.441
MAP65/Col-0	R2	0.406
MAP65/Col-0	R2	0.4611
MAP65/Col-0	R2	0.5152
MAP65/Col-0	R2	0.338
MAP65/Col-0	R2	0.3421
MAP65/Col-0	R2	0.3245
MAP65/Col-0	R2	0.3839
MAP65/Col-0	R2	0.2811
MAP65/Col-0	R2	0.3679
MAP65/ktn1	R2	0.1743
MAP65/ktn1	R2	0.1181
MAP65/ktn1	R2	0.0305
MAP65/ktn1	R2	0.0834
MAP65/ktn1	R2	0.0824
MAP65/ktn1	R2	0.1317
MAP65/ktn1	R2	0.1052
MAP65/ktn1	R2	0.0217
MAP65/ktn1	R2	0.0655
MAP65/ktn1	R2	0.033
MAP65/ktn1	R2	0.1074
MAP65/ktn1	R2	0.0659
MAP65/ktn1	R2	0.1009
MAP65/ktn1	R2	0.0586
MAP65/ktn1	R2	0.0106
MAP65/ktn1	R2	0.0259
MAP65/ktn1	R2	0.0092
MAP65/ktn1	R2	0.0683
MAP65/ktn1	R2	0.0476
MAP65/ktn1	R2	0.1064
MAP65/ktn1	R2	0.2174
MAP65/ktn1	R2	0.1441
MAP65/ktn1	R2	0.1799
MAP65/ktn1	R2	0.1234
MAP65/ktn1	R2	0.1199
MAP65/ktn1	R2	0.0875
MAP65/ktn1	R2	0.0559
MAP65/ktn1	R2	0.0657
MAP65/ktn1	R2	0.1686
MAP65/ktn1	R2	0.1227
MAP65/ktn1	R2	0.0633
MAP65/ktn1	R2	0.0821
MAP65/ktn1	R2	0.0587
MAP65/ktn1	R2	0.1069
MAP65/ktn1	R2	0.1066
MAP65/ktn1	R2	0.0705
MAP65/ktn1	R2	0.0724
MAP65/ktn1	R2	0.1424
MAP65/ktn1	R2	0.0996
MAP65/ktn1	R2	0.0836
MAP65/ktn1	R2	0.0406
MAP65/ktn1	R2	0.111
MAP65/ktn1	R2	0.1587
MAP65/ktn1	R2	0.0393
MAP65/ktn1	R2	0.1059
MAP65/ktn1	R2	0.0393
MAP65/ktn1	R2	0.106
MAP65/ktn1	R2	0.0325
MAP65/ktn1	R2	0.0794
MAP65/ktn1	R2	0.1014
MAP65/ktn1	R2	0.1039
MAP65/ktn1	R2	0.1632
MAP65/ktn1	R2	0.022
MAP65/Col-0	R3	0.3137
MAP65/Col-0	R3	0.2851
MAP65/Col-0	R3	0.2175
MAP65/Col-0	R3	0.2789
MAP65/Col-0	R3	0.4156
MAP65/Col-0	R3	0.4672
MAP65/Col-0	R3	0.3553
MAP65/Col-0	R3	0.2994
MAP65/Col-0	R3	0.5673
MAP65/Col-0	R3	0.3736
MAP65/Col-0	R3	0.4006
MAP65/Col-0	R3	0.2617
MAP65/Col-0	R3	0.3823
MAP65/Col-0	R3	0.4173
MAP65/Col-0	R3	0.4477
MAP65/Col-0	R3	0.4686
MAP65/Col-0	R3	0.3866
MAP65/Col-0	R3	0.3625
MAP65/Col-0	R3	0.4784
MAP65/Col-0	R3	0.339
MAP65/Col-0	R3	0.4057
MAP65/Col-0	R3	0.304
MAP65/Col-0	R3	0.5062
MAP65/Col-0	R3	0.3245
MAP65/Col-0	R3	0.3519
MAP65/Col-0	R3	0.2826
MAP65/Col-0	R3	0.3149
MAP65/Col-0	R3	0.482
MAP65/Col-0	R3	0.3829
MAP65/Col-0	R3	0.2777
MAP65/ktn1	R3	0.1311
MAP65/ktn1	R3	0.1376
MAP65/ktn1	R3	0.0946
MAP65/ktn1	R3	0.0786
MAP65/ktn1	R3	0.2212
MAP65/ktn1	R3	0.0924
MAP65/ktn1	R3	0.1231
MAP65/ktn1	R3	0.3276
MAP65/ktn1	R3	0.1931
MAP65/ktn1	R3	0.0769
MAP65/ktn1	R3	0.2494
MAP65/ktn1	R3	0.2536
MAP65/ktn1	R3	0.2131
MAP65/ktn1	R3	0.2708
MAP65/ktn1	R3	0.2266
MAP65/ktn1	R3	0.2306
MAP65/ktn1	R3	0.1679
MAP65/ktn1	R3	0.0727
MAP65/ktn1	R3	0.1957
MAP65/ktn1	R3	0.1828
MAP65/ktn1	R3	0.1028
MAP65/ktn1	R3	0.3133
MAP65/ktn1	R3	0.3245
MAP65/ktn1	R3	0.2594
MAP65/ktn1	R3	0.0756
MAP65/ktn1	R3	0.1433
MAP65/ktn1	R3	0.0884
MAP65/ktn1	R3	0.0465
MAP65/ktn1	R3	0.209
MAP65/ktn1	R3	0.266
MAP65/ktn1	R3	0.0735
MAP65/ktn1	R3	0.125
MAP65/ktn1	R3	0.0366
MAP65/ktn1	R3	0.2571
MAP65/ktn1	R3	0.1162
MAP65/ktn1	R3	0.1035

## Sheet: Figure 5D 
Figure 5D–Source Data 1
Fig5D_Col0vsKtn_TurnNumber
				Straight	1/2L	1L	2L	<2L	npapilles	nstigmates
ktn1 x Col-0	R1	S13	mean	0.206186	0.185567	0.360825	0.103093	0.14433	97	8
			SEM	0.0455065	0.0275394	0.0432936	0.0306326	0.0373013
	R2	S13	mean	0.207792	0.207792	0.415584	0.103896	0.0649351	77	6
			SEM	0.0480552	0.0271546	0.0320811	0.0291169	0.0278478
	R3	S13	mean	0.215686	0.169935	0.346405	0.156863	0.111111	153	9
			SEM	0.0285452	0.0239062	0.0265864	0.0251757	0.0273815
Col-0 x Col-0	R1	S13	mean	0.627451	0.333333	0.0196078	0.0196078	0	51	6
			SEM	0.0504964	0.0325062	0.0277778	0.0208333	0
	R2	S13	mean	0.526316	0.350877	0.105263	0.0175439	0	57	6
			SEM	0.0622886	0.0576844	0.0257357	0.0128205	0
	R3	S13	mean	0.636364	0.251748	0.104895	0.00699301	0	143	8
			SEM	0.0477995	0.0369355	0.0357432	0.013041	0
Col-0 x Col-0	R1+R2+R3	S13	mean	60.9562	29.0837	8.76494	1.19522	0	251	27
			SEM	2.62313	2.12388	1.73072	0.731345	0
ktn1 x Col-0	R1+R2+R3	S13	mean	21.1009	18.3486	36.6972	12.844	11.0092	327	23
			SEM	2.23367	1.46558	2.02188	1.63605	1.78905

## Sheet: F5-SF2
Figure 5 – figure supplement 2.
Figure 5 – figure supplement 2A
Hydrated pollen percentage
	Genotype	stigma	percentage
	col0	1	91.4634
	col0	2	83.3333
	col0	3	86.5854
	col0	4	87.8788
	col0	5	89.4231
	col0	6	87.037
	col0	7	93.5484
	col0	8	87.0968
	col0	9	88.7218
	col0	10	90.7216
	ktn1	1	90.3361
	ktn1	2	87.7005
	ktn1	3	91.7857
	ktn1	4	92.5676
	ktn1	5	92.1053
	ktn1	6	87.7551
	ktn1	7	94.382
	ktn1	8	88.1579
	ktn1	9	87.0787
	ktn1	10	90.0943
Figure 5 – figure supplement 2D
	Col-0 x Col-0	Col-0 x ktn1-5	ktn1-5 x ktn1-5	ktn1-5xCol-0
Seeds number per fruit	47	49	11	10
	58	45	14	14
	50	57	14	14
	47	56	18	7
	52	38	14	9
	62	45	15	12
	51	36	16	5
	59		15	5
	56		14	12
	63		8	11
	59		15	5
	56		14
	58		7
	58		4
			15
			14
			10
			17

## Sheet: F5-SF3
Figure 5 – figure supplement 3
Fig_CellWallMutants_TurnNumber
A			Straight	half loop	1L	2L	<2L
	Col0 x Col0	mean	0.552479	0.299472	0.142947	0	0.00510204	14	stigma number
		ecart type	0.114478	0.101721	0.0729857	0	0.0190901	116	papillae number
		sem	0.0305956	0.0271861	0.0195062	0	0.00510204
	xxt1 xxt2 x Col0	mean	0.533779	0.339676	0.116128	0.0104167	0	12	stigma number
		ecart type	0.0994098	0.0989109	0.11089	0.0360844	0	116	papillae number
		sem	0.0286971	0.0285531	0.0320112	0.0104167	0
B			Straight	half loop	1L	2L	<2L
	Col0 x Col0	mean	0.521739	0.313043	0.147826	0.00869565	0.00869565	14	stigma number
		ecart type	0.195079	0.107703	0.15204	0.0267261	0.0148478	115	papillae number
		sem	0.052137	0.0287849	0.0406344	0.00714286	0.00396825
	prc1 x Col-0	mean	0.55	0.37	0.08	0	0	12	stigma number
		ecart type	0.128825	0.0828074	0.0972453	0	0	100	papillae number
		sem	0.0371886	0.0239044	0.0280723	0	0
C			Straight	half loop	1L	2L	<2L
	Col0 x Col0	mean	0.54375	0.30625	0.13125	0.01875	0	22	stigma number
		ecart type	0.122069	0.0896165	0.108159	0.0351249	0	160	papillae number
		sem	0.0260251	0.0191063	0.0230596	0.00748864	0
	qua2.1 x Col0	mean	0.50625	0.33125	0.1625	0.0125	0	18	stigma number
		ecart type	0.112023	0.103921	0.0994486	0.0223436	0	162	papillae number
		sem	0.0264042	0.0221561	0.0212025	0.00476367	0
D			Straight	half loop	1L	2L	<2L
	Col0 x Col0	mean	0.536842	0.368421	0.0842105	0.0105263	0	14	stigma number
		ecart type	0.118928	0.115483	0.0726357	0.0205586	0	95	papillae number
		sem	0.0317847	0.030864	0.0194127	0.00549451	0
	any1 x Col-0	mean	0.516484	0.417582	0.0549451	0	0.010989	14	stigma number
		ecart type	0.104495	0.0982824	0.066944	0	0.0534522	91	papillae number
		sem	0.0279276	0.0262671	0.0178915	0	0.0142857
E			Straight	half loop	1L	2L	<2L
	Col0 x Col0	mean	0.510638	0.340426	0.106383	0.0425532	0	14	nb stig
		ecart type	0.14867	0.108446	0.0804806	0.0841109	0	141	nb pap
		sem	0.0397337	0.0289835	0.0215094	0.0224796	0
	kor1xCol0	mean	0.472527	0.340659	0.175824	0.010989	0	11	nb stig
		ecart type	0.143199	0.117094	0.125018	0.0274101	0	91	nb pap
		sem	0.043176	0.0353051	0.0376943	0.00826446	0
D			Straight	half loop	1L	2L	<2L
	Col0 x Col0	moyenne	0.503597	0.345324	0.143885	0	0.00719424	18	nb stig
		ecart type	0.164571	0.109634	0.099169	0	0.0157135	139	nb pap
		sem	0.0387898	0.0258409	0.0233744	0	0.0037037
	xyl1.4 x Col0	moyenne	0.574074	0.305556	0.101852	0.00925926	0.00925926	16	nb stig
		ecart type	0.147794	0.145043	0.112374	0.0416667	0.025	108	nb pap
		sem	0.0369484	0.0362608	0.0280936	0.0104167	0.00625

## Sheet: F5-SF4
Figure 5 – figure supplement 4.
Cellulosic and Non-cellulosic monosaccharide composition of pistils
TFA hydrolyzed (for non-cellulosic) AIR was analyzed by HPAEC-PAD
Sulfuric Acid hydrolyzed pellet (for cellulose content) from TFA treatment was analyzed by HPAEC-PAD
3 biological replicates
nMol quantity in the extract
	Fucose	Arabinose	Rhamnose	Galactose	Glucose from TFA	Xylose	GalA	GlcA	Mannose	glucose from cristalline cellulose		Sum
Col-0 A	4.0122	59.3733	15.5122	40.9444	19.7778	16.7867	75.4845	2.76289	9.94444	56.8933		301.492
ktn1 A	4.80488	75.6533	19.3415	45.3111	27.6222	21.0267	100.701	3.02062	12.3222	98.7267		408.53
xxt1xxt2 A	1.57317	40.88	11.5366	26.3444	10.5222	7.05333	51.7938	3.98969	6.25556	43.5067		203.455
Col-0 B	3.64634	54.2	14.7561	34	14.2111	14.68	61.6598	2.36082	8.84444	58.5667		266.925
ktn1 B	3.60976	62.4267	17	44.9556	29.1556	16.24	65.3608	2.81443	11.6556	93.7067		346.925
xxt1xxt2 B	1.28049	32.6533	9.21951	21.7556	6.07778	5.97333	40.8763	3.27835	5.14444	31.7933		158.052
Col-0 C	4.15854	65.5867	17.5	41.4111	18.1	18.0133	80.2371	2.74227	10.6889	73.6267		332.065
ktn1 C	5.71951	109.16	24.9512	71.7111	52.2222	25.44	132.773	6.1134	16.6778	153.947		598.715
xxt1xxt2 C	1.7439	45.5067	12.3049	27.9111	11.0889	7.18667	54.1237	1.82474	7.2	38.4867		207.377
Mol %	Fucose	Arabinose	Rhamnose	Galactose	Glucose from TFA	Xylose	GalA	GlcA	Mannose	glucose from cristalline cellulose
Col-0 A	1.33078	19.6932	5.14515	13.5806	6.55997	5.56787	25.037	0.916405	3.29841	18.8706
Col-0 B	1.36605	20.3053	5.52818	12.7376	5.324	5.49967	23.1	0.884452	3.31345	21.9412
Col-0 C	1.25233	19.7512	5.27006	12.4708	5.45075	5.42465	24.1631	0.825824	3.21892	22.1724
ktn1 C	0.955298	18.2324	4.16746	11.9775	8.72238	4.2491	22.1764	1.02109	2.78559	25.7128
ktn1 A	1.17614	18.5184	4.7344	11.0913	6.76137	5.14691	24.6496	0.739387	3.01623	24.1663
ktn1 B	1.0405	17.9943	4.90019	12.9583	8.40399	4.68113	18.84	0.811251	3.35968	27.0106
xxt1xxt2 B	0.810167	20.6598	5.8332	13.7648	3.84542	3.77934	25.8625	2.07422	3.2549	20.1157
xxt1xxt2 C	0.840932	21.9439	5.93357	13.4591	5.34721	3.4655	26.0992	0.879914	3.47193	18.5588
xxt1xxt2 A	0.773226	20.0928	5.67032	12.9485	5.17176	3.46677	25.4571	1.96096	3.07466	21.3839
Average	Mol%
	Fuc	Ara	Rha	Gal	Glc (Hemicellulose + amorphous cellulose)	Xyl	GalA	GlcA	Man	Glc (Crystalline cellulose)
Col-0	1.31639	19.9166	5.31446	12.9297	5.77824	5.49739	24.1	0.87556	3.27693	20.9947
ktn1	1.05731	18.2484	4.60069	12.009	7.96258	4.69238	21.8887	0.857242	3.05383	25.6299
xxt1xxt2	0.808108	20.8989	5.81237	13.3908	4.78813	3.57054	25.8062	1.63837	3.26716	20.0194
Standard deviation
	Fuc	Ara	Rha	Gal	Glc (Hemicellulose + amorphous cellulose)	Xyl	GalA	GlcA	Man	Glc (Crystalline cellulose)
Col-0	0.0582131	0.337915	0.195337	0.579295	0.679958	0.0716373	0.970033	0.0459407	0.0507975	1.84318
ktn1	0.111376	0.262433	0.384232	0.933919	1.05239	0.449009	2.91544	0.146373	0.288882	1.42398
xxt1xxt2	0.0339001	0.948399	0.132855	0.412398	0.821109	0.180827	0.324716	0.659274	0.198923	1.41501
ttest	Fuc	Ara	Rha	Gal	Glc (Hemicellulose + amorphous cellulose)	Xyl	GalA	GlcA	Man	Glc (Crystalline cellulose)
ktn/col	0.037196	0.00309717	0.0649402	0.233731	0.0479275	0.0864146	0.318946	0.852469	0.311862	0.0288193
xxt/col	0.000676122	0.207539	0.0270515	0.33042	0.185444	0.00092964	0.0806192	0.182385	0.941065	0.510021
	<0,05
	<0,01
	<0,001
Xyloglucan oligosaccharides fingerprint
Endo-cellulase digestion of AIR were analysed with MALDI-TOF
3 biological replicates															Pool the different type of side chains to visualise the presence of shorter to longer side chains on XyG with a terminal xylose, galactose or fucose
		Spectrum: E10-colA-60\0_E10\1 1Ref Raw (D:\DATA\Cyril\Julien\27-11-2019-stigmate-TGaude\E10-colA-60\0_E10\1)	Spectrum: F10-colB-60\0_F10\1 1Ref Raw (D:\DATA\Cyril\Julien\27-11-2019-stigmate-TGaude\F10-colB-60\0_F10\1)	Spectrum: G10-colC-60\0_G10\1 1Ref Raw (D:\DATA\Cyril\Julien\27-11-2019-stigmate-TGaude\G10-colC-60\0_G10\1)	Spectrum: H10-ktnA-60\0_H10\1 1Ref Raw (D:\DATA\Cyril\Julien\27-11-2019-stigmate-TGaude\H10-ktnA-60\0_H10\1)	Spectrum: I10-ktnB-60\0_I10\1 1Ref Raw (D:\DATA\Cyril\Julien\27-11-2019-stigmate-TGaude\I10-ktnB-60\0_I10\1)	Spectrum: J10-ktnC-60\0_J10\1 1Ref Raw (D:\DATA\Cyril\Julien\27-11-2019-stigmate-TGaude\J10-ktnC-60\0_J10\1)										Spectrum: E10-colA-60\0_E10\1 1Ref Raw (D:\DATA\Cyril\Julien\27-11-2019-stigmate-TGaude\E10-colA-60\0_E10\1)	Spectrum: F10-colB-60\0_F10\1 1Ref Raw (D:\DATA\Cyril\Julien\27-11-2019-stigmate-TGaude\F10-colB-60\0_F10\1)	Spectrum: G10-colC-60\0_G10\1 1Ref Raw (D:\DATA\Cyril\Julien\27-11-2019-stigmate-TGaude\G10-colC-60\0_G10\1)	Spectrum: H10-ktnA-60\0_H10\1 1Ref Raw (D:\DATA\Cyril\Julien\27-11-2019-stigmate-TGaude\H10-ktnA-60\0_H10\1)	Spectrum: I10-ktnB-60\0_I10\1 1Ref Raw (D:\DATA\Cyril\Julien\27-11-2019-stigmate-TGaude\I10-ktnB-60\0_I10\1)	Spectrum: J10-ktnC-60\0_J10\1 1Ref Raw (D:\DATA\Cyril\Julien\27-11-2019-stigmate-TGaude\J10-ktnC-60\0_J10\1)
	Raw data (peak area)	Col-0 A	Col-0 B	Col-0 C	ktn1 A	ktn1 B	ktn1 C									Raw data (peak area)	Col-0 A	Col-0 B	Col-0 C	ktn1 A	ktn1 B	ktn1 C
	XXG (791)	3577.88	3995.88	2958.08	4851.11	6167.19	1236.34								For this two, not sure in which category they shloud be	XLLG (1409)	239.567	377.448	266.966	733.811	1050.16	294.555
	XLG (953)	609.527	817.918	622.005	1095.88	1630.27	272.764								For this two, not sure in which category they shloud be	XLFG (1555)	462.237	650.77	378.823	478.325	499.597	230.087
	GFG (967)	217.807	177.37	0	537.23	964.038	148.185									X terminal (xxg, xxxg)	9089.51	10286.5	8450.66	9913.01	11995.1	3076.42
	XXXG (1085)	5511.63	6290.62	5492.57	5061.9	5827.87	1840.08									L terminal (xlg, xxlg)	1667.65	2055.6	1577.33	2976.38	4004.36	941.879
	XFG (1099)	460.065	334.962	169.701	839.814	1522.95	227.767									F terminal (gfg, fxg, flg, xxfg)	10154.5	13290.6	9188.34	20964.8	28623.7	8664.64
	XXLG (1247)	1058.12	1237.68	955.326	1880.5	2374.09	669.116									Somme	21613.4	26660.9	19862.1	35066.4	46172.9	13207.6
	LFG (+/- OAc - 1261+1303)	205.983	677.715	249.471	1371.72	2452.45	509.214
	XLLG (1409)	239.567	377.448	266.966	733.811	1050.16	294.555
	XXFG (+/- OAc - 1393+1409)	9270.6	12100.6	8769.17	18216.1	23684.3	7779.47									Relative abundance
	XLFG (1555)	462.237	650.77	378.823	478.325	499.597	230.087										Col-0 A	Col-0 B	Col-0 C	ktn1 A	ktn1 B	ktn1 C
	Sum	21613.4	26660.9	19862.1	35066.4	46172.9	13207.6									XLLG (1409)	0.0110842	0.0141573	0.013441	0.0209263	0.0227441	0.022302
																XLFG (1555)	0.0213866	0.0244091	0.0190726	0.0136406	0.0108201	0.0174208
																X terminal (xxg, xxxg)	0.420549	0.385827	0.425466	0.282693	0.259786	0.232928
	Relative abundance															L terminal (xlg, xxlg)	0.0771581	0.0771016	0.079414	0.0848785	0.0867253	0.0713135
		Col-0 A	Col-0 B	Col-0 C	ktn1 A	ktn1 B	ktn1 C									F terminal (gfg, fxg, flg, xxfg)	0.469822	0.498505	0.462606	0.597862	0.619924	0.656035
	XXG (791)	0.16554	0.149878	0.148931	0.138341	0.133567	0.0936085									SOMME	1	1	1	1	1	1
	XLG (953)	0.0282013	0.0306785	0.0313161	0.0312515	0.035308	0.020652
	GFG (967)	0.0100774	0.00665279	0	0.0153204	0.0208789	0.0112197
	XXXG (1085)	0.255009	0.235949	0.276535	0.144352	0.126219	0.13932									Average	Col-0	ktn1		Standard deviation	Col-0	ktn1
	XFG (1099)	0.0212861	0.0125638	0.00854394	0.0239493	0.0329836	0.0172452									XLLG	0.0128942	0.0219908		XLLG	0.00160791	0.000948002
	XXLG (1247)	0.0489568	0.0464231	0.0480979	0.053627	0.0514174	0.0506615									XLFG	0.0216228	0.0139605		XLFG	0.00267607	0.00331196
	LFG (+/- OAc - 1261+1303)	0.00953032	0.0254198	0.0125601	0.0391179	0.0531144	0.0385546									X terminal (xxg, xxxg)	0.410614	0.258469		X terminal (xxg, xxxg)	0.0216067	0.0249083
	XLLG (1409)	0.0110842	0.0141573	0.013441	0.0209263	0.0227441	0.022302									L terminal (xlg, xxlg)	0.0778913	0.0809724		L terminal (xlg, xxlg)	0.00131905	0.00841567
	XXFG (+/- OAc - 1393+1409)	0.428928	0.453869	0.441502	0.519474	0.512948	0.589016									F terminal (gfg, fxg, flg, xxfg)	0.476978	0.624607		F terminal (gfg, fxg, flg, xxfg)	0.0189892	0.0293681
	XLFG (1555)	0.0213866	0.0244091	0.0190726	0.0136406	0.0108201	0.0174208
	Average				Standard deviation
		Col-0	ktn1			Col-0	ktn1									ttest
XXG	XXG (791)	0.154783	0.121839		XXG (791)	0.00932783	0.0245645									XLLG (1409)	0.00107888
XLG	XLG (953)	0.0300653	0.0290705		XLG (953)	0.00164545	0.00756747									XLFG (1555)	0.0356354
GFG	GFG (967)	0.00557673	0.0158063		GFG (967)	0.00512415	0.00484789									X terminal (xxg, xxxg)	0.00132903
XXXG	XXXG (1085)	0.255831	0.13663		XXXG (1085)	0.0203056	0.00936116									L terminal (xlg, xxlg)	0.564967
XFG	XFG (1099)	0.0141313	0.024726		XFG (1099)	0.00651408	0.00789791									F terminal (gfg, fxg, flg, xxfg)	0.00186129
XXLG	XXLG (1247)	0.0478259	0.0519019		XXLG (1247)	0.00128854	0.00154097
LFG	LFG (+/- OAc - 1261+1303)	0.0158367	0.0435957		LFG (+/- OAc - 1261+1303)	0.00843628	0.00824831
XLLG	XLLG (1409)	0.0128942	0.0219908		XLLG (1409)	0.00160791	0.000948002
XXFG	XXFG (+/- OAc - 1393+1409)	0.441433	0.540479		XXFG (+/- OAc - 1393+1409)	0.0124706	0.0421604
XLFG	XLFG (1555)	0.0216228	0.0139605		XLFG (1555)	0.00267607	0.00331196
X terminal (xxg, xxxg)	X terminal (xxg, xxxg)	0.410614	0.258469		X terminal (xxg, xxxg)	0.0216067	0.0249083
L terminal (xlg, xxlg)	L terminal (xlg, xxlg)	0.0778913	0.0809724		L terminal (xlg, xxlg)	0.00131905	0.00841567
F terminal (gfg, fxg, flg, xxfg)	F terminal (gfg, fxg, flg, xxfg)	0.476978	0.624607		F terminal (gfg, fxg, flg, xxfg)	0.0189892	0.0293681
	ttest
	XXG (791)	0.0956395
	XLG (953)	0.834828
	GFG (967)	0.0659312
	XXXG (1085)	0.000764577
	XFG (1099)	0.147528
	XXLG (1247)	0.0245696
	LFG (+/- OAc - 1261+1303)	0.0151597
	XLLG (1409)	0.00107888
	XXFG (+/- OAc - 1393+1409)	0.0175127
	XLFG (1555)	0.0356354
