# Supplementary material for: KATANIN-dependent mechanical properties of the stigmatic cell wall mediate the pollen tube path in Arabidopsis
Source: eLife. 2020 Sep 1;9:e57282. doi: 10.7554/eLife.57282 (PMC7462616; doi:10.7554/eLife.57282)
Supplement: Figure 6—source data 1. [file elife-57282-fig6-data1.xlsx]

## Sheet: Figure 6D
Figure 6D–Source Data 1
Fig6D_DeformationMeasurements				De = external deformation
				Di = internal deformation
Genotype	Papilla	Deformation	length
Col-0-De	1	De	1.794
Col-0-De	2	De	1.6965
Col-0-De	3	De	1.826
Col-0-De	4	De	1.62
Col-0-De	5	De	1.3475
Col-0-De	6	De	1.6705
Col-0-De	7	De	2.424
Col-0-De	8	De	3.5875
Col-0-De	9	De	2.3895
Col-0-De	10	De	1.809
Col-0-De	11	De	1.945
Col-0-De	12	De	1.3955
Col-0-De	13	De	3.437
Col-0-De	14	De	1.7695
Col-0-De	15	De	2.0125
Col-0-Di	1	Di	1.9645
Col-0-Di	2	Di	2.7415
Col-0-Di	3	Di	2.0535
Col-0-Di	4	Di	3.0825
Col-0-Di	5	Di	2.378
Col-0-Di	6	Di	2.64
Col-0-Di	7	Di	1.8075
Col-0-Di	8	Di	1.2765
Col-0-Di	9	Di	2.041
Col-0-Di	10	Di	2.834
Col-0-Di	11	Di	2.0125
Col-0-Di	12	Di	1.796
Col-0-Di	13	Di	1.918
Col-0-Di	14	Di	3.0035
Col-0-Di	15	Di	1.5335
ktn1-De	1	De	3.0435
ktn1-De	2	De	2.4045
ktn1-De	3	De	3.3075
ktn1-De	4	De	2.9005
ktn1-De	5	De	3.5615
ktn1-De	6	De	2.9515
ktn1-De	7	De	2.944
ktn1-De	8	De	3.6065
ktn1-De	9	De	2.757
ktn1-De	10	De	4.7135
ktn1-De	11	De	3.866
ktn1-De	12	De	4.1735
ktn1-De	13	De	3.1345
ktn1-De	14	De	2.319
ktn1-De	15	De	2.5205
ktn1-De	16	De	2.6535
ktn1-Di	1	Di	1.0105
ktn1-Di	2	Di	1.656
ktn1-Di	3	Di	0.975
ktn1-Di	4	Di	0.7815
ktn1-Di	5	Di	1.341
ktn1-Di	6	Di	0.936
ktn1-Di	7	Di	1.416
ktn1-Di	8	Di	1.0685
ktn1-Di	9	Di	0.721
ktn1-Di	10	Di	0.9915
ktn1-Di	11	Di	1.8205
ktn1-Di	12	Di	0.703
ktn1-Di	13	Di	1.5365
ktn1-Di	14	Di	0.8665
ktn1-Di	15	Di	1.62
ktn1-Di	16	Di	0.56

## Sheet: Figure 6F
Figure 6F–Source Data 1
Fig6F_AFM
Genotype	Stigmas	YoungModulus
Col-0	Col1	18900000
Col-0	Col1	19200000
Col-0	Col1	19800000
Col-0	Col1	21800000
Col-0	Col1	21900000
Col-0	Col1	22100000
Col-0	Col1	22200000
Col-0	Col1	22300000
Col-0	Col1	22400000
Col-0	Col1	22500000
Col-0	Col1	22600000
Col-0	Col1	22700000
Col-0	Col1	22800000
Col-0	Col1	23000000
Col-0	Col1	23000000
Col-0	Col1	23100000
Col-0	Col1	23300000
Col-0	Col1	23500000
Col-0	Col1	23600000
Col-0	Col1	23800000
Col-0	Col1	24100000
Col-0	Col1	24100000
Col-0	Col1	24100000
Col-0	Col1	24200000
Col-0	Col1	24200000
Col-0	Col1	24200000
Col-0	Col1	24400000
Col-0	Col1	24600000
Col-0	Col1	24700000
Col-0	Col1	25100000
Col-0	Col1	25300000
Col-0	Col1	25500000
Col-0	Col1	26000000
Col-0	Col1	26000000
Col-0	Col1	26300000
Col-0	Col1	26500000
Col-0	Col1	26500000
Col-0	Col1	26600000
Col-0	Col1	26600000
Col-0	Col1	26600000
Col-0	Col1	26900000
Col-0	Col1	26900000
Col-0	Col1	27000000
Col-0	Col1	27300000
Col-0	Col1	27400000
Col-0	Col1	27500000
Col-0	Col1	27600000
Col-0	Col1	27700000
Col-0	Col1	27800000
Col-0	Col1	27800000
Col-0	Col1	27900000
Col-0	Col1	28000000
Col-0	Col1	28000000
Col-0	Col1	28100000
Col-0	Col1	28700000
Col-0	Col1	28900000
Col-0	Col1	29000000
Col-0	Col1	29500000
Col-0	Col1	29600000
Col-0	Col1	29600000
Col-0	Col1	29700000
Col-0	Col1	30000000
Col-0	Col1	30300000
Col-0	Col1	30400000
Col-0	Col1	30500000
Col-0	Col1	30600000
Col-0	Col1	32400000
Col-0	Col1	33000000
Col-0	Col1	33200000
Col-0	Col1	34700000
Col-0	Col1	34900000
Col-0	Col2	10200000
Col-0	Col2	10600000
Col-0	Col2	12300000
Col-0	Col2	12900000
Col-0	Col2	14500000
Col-0	Col2	15200000
Col-0	Col2	15700000
Col-0	Col2	24300000
Col-0	Col2	24900000
Col-0	Col2	25000000
Col-0	Col2	25200000
Col-0	Col2	25800000
Col-0	Col2	26400000
Col-0	Col2	26700000
Col-0	Col2	27100000
Col-0	Col2	27200000
Col-0	Col2	27500000
Col-0	Col2	27500000
Col-0	Col2	27700000
Col-0	Col2	28500000
Col-0	Col2	28700000
Col-0	Col2	29000000
Col-0	Col2	29300000
Col-0	Col2	29300000
Col-0	Col2	29700000
Col-0	Col2	29900000
Col-0	Col2	30200000
Col-0	Col2	30600000
Col-0	Col2	30700000
Col-0	Col2	30900000
Col-0	Col2	31000000
Col-0	Col2	31000000
Col-0	Col2	31100000
Col-0	Col2	31400000
Col-0	Col2	31500000
Col-0	Col2	31500000
Col-0	Col2	31600000
Col-0	Col2	31900000
Col-0	Col2	32000000
Col-0	Col2	32000000
Col-0	Col2	32000000
Col-0	Col2	32000000
Col-0	Col2	32100000
Col-0	Col2	32200000
Col-0	Col2	32200000
Col-0	Col2	32300000
Col-0	Col2	32600000
Col-0	Col2	32600000
Col-0	Col2	32700000
Col-0	Col2	32700000
Col-0	Col2	32800000
Col-0	Col2	32900000
Col-0	Col2	33100000
Col-0	Col2	33200000
Col-0	Col2	33300000
Col-0	Col2	33400000
Col-0	Col2	33400000
Col-0	Col2	33400000
Col-0	Col2	33500000
Col-0	Col2	33500000
Col-0	Col2	33600000
Col-0	Col2	33700000
Col-0	Col2	33700000
Col-0	Col2	33700000
Col-0	Col2	33800000
Col-0	Col2	33800000
Col-0	Col2	33900000
Col-0	Col2	33900000
Col-0	Col2	33900000
Col-0	Col2	33900000
Col-0	Col2	34000000
Col-0	Col2	34000000
Col-0	Col2	34000000
Col-0	Col2	34100000
Col-0	Col2	34200000
Col-0	Col2	34300000
Col-0	Col2	34400000
Col-0	Col2	34400000
Col-0	Col2	34500000
Col-0	Col2	34500000
Col-0	Col2	34600000
Col-0	Col2	34800000
Col-0	Col2	34800000
Col-0	Col2	34800000
Col-0	Col2	35000000
Col-0	Col2	35000000
Col-0	Col2	35100000
Col-0	Col2	35100000
Col-0	Col2	35100000
Col-0	Col2	35100000
Col-0	Col2	35200000
Col-0	Col2	35200000
Col-0	Col2	35400000
Col-0	Col2	35400000
Col-0	Col2	35500000
Col-0	Col2	35500000
Col-0	Col2	35500000
Col-0	Col2	35600000
Col-0	Col2	35900000
Col-0	Col2	35900000
Col-0	Col2	36000000
Col-0	Col2	36200000
Col-0	Col2	36500000
Col-0	Col2	36600000
Col-0	Col2	37000000
Col-0	Col2	37000000
Col-0	Col2	37000000
Col-0	Col3	8270000
Col-0	Col3	9250000
Col-0	Col3	9390000
Col-0	Col3	10600000
Col-0	Col3	12400000
Col-0	Col3	13700000
Col-0	Col3	12900000
Col-0	Col3	10700000
Col-0	Col3	11400000
Col-0	Col3	12500000
Col-0	Col3	14300000
Col-0	Col3	15700000
Col-0	Col3	16000000
Col-0	Col3	16400000
Col-0	Col3	17500000
Col-0	Col3	18400000
Col-0	Col3	18200000
Col-0	Col3	16500000
Col-0	Col3	17300000
Col-0	Col3	18300000
Col-0	Col3	18400000
Col-0	Col3	18800000
Col-0	Col3	19500000
Col-0	Col3	20000000
Col-0	Col3	20500000
Col-0	Col3	21700000
Col-0	Col3	22300000
Col-0	Col3	21000000
Col-0	Col3	21000000
Col-0	Col3	22000000
Col-0	Col3	23000000
Col-0	Col3	24800000
Col-0	Col3	24700000
Col-0	Col3	25800000
Col-0	Col3	27000000
Col-0	Col3	26400000
Col-0	Col3	27000000
Col-0	Col3	26200000
Col-0	Col3	26000000
Col-0	Col3	26100000
Col-0	Col3	27700000
Col-0	Col3	28900000
Col-0	Col3	28900000
Col-0	Col3	29300000
Col-0	Col3	29400000
Col-0	Col3	30500000
Col-0	Col3	30700000
Col-0	Col3	30500000
Col-0	Col3	31700000
Col-0	Col3	30800000
Col-0	Col3	31900000
Col-0	Col3	32000000
Col-0	Col3	31600000
Col-0	Col3	32300000
Col-0	Col3	33500000
Col-0	Col3	34100000
Col-0	Col3	35200000
Col-0	Col3	35900000
Col-0	Col3	36700000
Col-0	Col3	35100000
Col-0	Col3	34000000
Col-0	Col3	35700000
Col-0	Col3	35200000
Col-0	Col3	35600000
Col-0	Col3	36700000
Col-0	Col3	38200000
Col-0	Col3	38100000
Col-0	Col3	35700000
Col-0	Col4	20300000
Col-0	Col4	21500000
Col-0	Col4	21800000
Col-0	Col4	22200000
Col-0	Col4	22800000
Col-0	Col4	24100000
Col-0	Col4	24200000
Col-0	Col4	24900000
Col-0	Col4	25000000
Col-0	Col4	25100000
Col-0	Col4	26500000
Col-0	Col4	26700000
Col-0	Col4	26900000
Col-0	Col4	27000000
Col-0	Col4	27000000
Col-0	Col4	27700000
Col-0	Col4	27900000
Col-0	Col4	28100000
Col-0	Col4	28300000
Col-0	Col4	28500000
Col-0	Col4	28600000
Col-0	Col4	28800000
Col-0	Col4	28800000
Col-0	Col4	29100000
Col-0	Col4	29200000
Col-0	Col4	29400000
Col-0	Col4	29600000
Col-0	Col4	29900000
Col-0	Col4	30100000
Col-0	Col4	30100000
Col-0	Col4	30200000
Col-0	Col4	30400000
Col-0	Col4	30500000
Col-0	Col4	30500000
Col-0	Col4	30600000
Col-0	Col4	30600000
Col-0	Col4	30700000
Col-0	Col4	30800000
Col-0	Col4	30900000
Col-0	Col4	30900000
Col-0	Col4	31000000
Col-0	Col4	31000000
Col-0	Col4	31300000
Col-0	Col4	31400000
Col-0	Col4	31600000
Col-0	Col4	31700000
Col-0	Col4	31800000
Col-0	Col4	31800000
Col-0	Col4	31900000
Col-0	Col4	31900000
Col-0	Col4	31900000
Col-0	Col4	32100000
Col-0	Col4	32300000
Col-0	Col4	32600000
Col-0	Col4	32900000
Col-0	Col4	33600000
Col-0	Col4	33700000
Col-0	Col4	33800000
Col-0	Col4	33800000
Col-0	Col4	34200000
Col-0	Col4	34500000
Col-0	Col4	34600000
Col-0	Col4	34600000
Col-0	Col4	35000000
Col-0	Col5	11100000
Col-0	Col5	12100000
Col-0	Col5	14500000
Col-0	Col5	14500000
Col-0	Col5	14600000
Col-0	Col5	14700000
Col-0	Col5	15100000
Col-0	Col5	15300000
Col-0	Col5	15400000
Col-0	Col5	15500000
Col-0	Col5	15600000
Col-0	Col5	15600000
Col-0	Col5	15900000
Col-0	Col5	16500000
Col-0	Col5	16500000
Col-0	Col5	16800000
Col-0	Col5	17100000
Col-0	Col5	17100000
Col-0	Col5	17200000
Col-0	Col5	17400000
Col-0	Col5	17400000
Col-0	Col5	17600000
Col-0	Col5	17700000
Col-0	Col5	17800000
Col-0	Col5	18000000
Col-0	Col5	18000000
Col-0	Col5	18000000
Col-0	Col5	18100000
Col-0	Col5	18100000
Col-0	Col5	18200000
Col-0	Col5	18200000
Col-0	Col5	18300000
Col-0	Col5	18300000
Col-0	Col5	18300000
Col-0	Col5	18300000
Col-0	Col5	18400000
Col-0	Col5	18400000
Col-0	Col5	18400000
Col-0	Col5	18400000
Col-0	Col5	18500000
Col-0	Col5	18500000
Col-0	Col5	18700000
Col-0	Col5	18700000
Col-0	Col5	18700000
Col-0	Col5	18900000
Col-0	Col5	19000000
Col-0	Col5	19000000
Col-0	Col5	19100000
Col-0	Col5	19100000
Col-0	Col5	19300000
Col-0	Col5	19300000
Col-0	Col5	19400000
Col-0	Col5	19400000
Col-0	Col5	19600000
Col-0	Col5	19600000
Col-0	Col5	19600000
Col-0	Col5	19600000
Col-0	Col5	19700000
Col-0	Col5	19700000
Col-0	Col5	19700000
Col-0	Col5	19700000
Col-0	Col5	19800000
Col-0	Col5	19800000
Col-0	Col5	19800000
Col-0	Col5	19800000
Col-0	Col5	20000000
Col-0	Col5	20000000
Col-0	Col5	20000000
Col-0	Col5	20000000
Col-0	Col5	20100000
Col-0	Col5	20100000
Col-0	Col5	20100000
Col-0	Col5	20100000
Col-0	Col5	20200000
Col-0	Col5	20300000
Col-0	Col5	20300000
Col-0	Col5	20300000
Col-0	Col5	20400000
Col-0	Col5	20400000
Col-0	Col5	20500000
Col-0	Col5	20500000
Col-0	Col5	20500000
Col-0	Col5	20600000
Col-0	Col5	20600000
Col-0	Col5	20600000
Col-0	Col5	20700000
Col-0	Col5	21000000
Col-0	Col5	21100000
Col-0	Col5	21100000
Col-0	Col5	21100000
Col-0	Col5	21300000
Col-0	Col5	21400000
Col-0	Col5	21400000
Col-0	Col5	21700000
Col-0	Col5	21700000
Col-0	Col5	21800000
Col-0	Col5	21800000
Col-0	Col5	21900000
Col-0	Col5	22300000
Col-0	Col5	22400000
Col-0	Col6	10400000
Col-0	Col6	10400000
Col-0	Col6	11100000
Col-0	Col6	11100000
Col-0	Col6	11600000
Col-0	Col6	11800000
Col-0	Col6	12200000
Col-0	Col6	12400000
Col-0	Col6	12800000
Col-0	Col6	13000000
Col-0	Col6	13200000
Col-0	Col6	13200000
Col-0	Col6	13500000
Col-0	Col6	13600000
Col-0	Col6	13600000
Col-0	Col6	13700000
Col-0	Col6	13800000
Col-0	Col6	13900000
Col-0	Col6	14600000
Col-0	Col6	15100000
Col-0	Col6	15700000
Col-0	Col6	15800000
Col-0	Col6	16100000
Col-0	Col6	16100000
Col-0	Col6	16200000
Col-0	Col6	16500000
Col-0	Col6	17500000
Col-0	Col6	17900000
Col-0	Col6	18200000
Col-0	Col6	18400000
Col-0	Col6	18400000
Col-0	Col6	18400000
Col-0	Col6	18500000
Col-0	Col6	18500000
Col-0	Col6	18600000
Col-0	Col6	18700000
Col-0	Col6	18800000
Col-0	Col6	18900000
Col-0	Col6	19000000
Col-0	Col6	19000000
Col-0	Col6	19100000
Col-0	Col6	19300000
Col-0	Col6	19400000
Col-0	Col6	19600000
Col-0	Col6	20000000
Col-0	Col6	20100000
Col-0	Col6	20100000
Col-0	Col6	20200000
Col-0	Col6	20400000
Col-0	Col6	20500000
Col-0	Col6	20600000
Col-0	Col6	20700000
Col-0	Col6	20800000
Col-0	Col6	20800000
Col-0	Col6	20800000
Col-0	Col6	21000000
Col-0	Col6	21000000
Col-0	Col6	21300000
Col-0	Col6	21400000
Col-0	Col6	21400000
Col-0	Col6	21400000
Col-0	Col6	21700000
Col-0	Col6	21800000
Col-0	Col6	22000000
Col-0	Col6	22300000
Col-0	Col6	22300000
Col-0	Col6	22300000
Col-0	Col6	22400000
Col-0	Col6	22500000
Col-0	Col6	22800000
Col-0	Col6	22800000
Col-0	Col6	22800000
Col-0	Col6	22900000
Col-0	Col6	23400000
Col-0	Col6	23600000
Col-0	Col6	23800000
Col-0	Col6	23800000
Col-0	Col6	24000000
Col-0	Col6	24100000
Col-0	Col6	24500000
Col-0	Col6	24700000
Col-0	Col6	24700000
Col-0	Col6	24900000
Col-0	Col6	25100000
Col-0	Col6	25200000
Col-0	Col6	25200000
Col-0	Col6	25300000
Col-0	Col6	25300000
Col-0	Col6	25800000
Col-0	Col6	25900000
Col-0	Col6	26000000
Col-0	Col6	26100000
Col-0	Col6	26300000
Col-0	Col6	26500000
Col-0	Col6	26500000
Col-0	Col6	26500000
Col-0	Col6	26900000
Col-0	Col6	27100000
Col-0	Col6	27400000
Col-0	Col6	27700000
Col-0	Col6	28000000
Col-0	Col6	32400000
Col-0	Col6	35400000
Col-0	Col8	15800000
Col-0	Col8	16800000
Col-0	Col8	16800000
Col-0	Col8	17000000
Col-0	Col8	17200000
Col-0	Col8	17200000
Col-0	Col8	17700000
Col-0	Col8	18000000
Col-0	Col8	18000000
Col-0	Col8	18900000
Col-0	Col8	19200000
Col-0	Col8	20500000
Col-0	Col8	20900000
Col-0	Col8	20900000
Col-0	Col8	21100000
Col-0	Col8	21200000
Col-0	Col8	21300000
Col-0	Col8	21700000
Col-0	Col8	21800000
Col-0	Col8	22100000
Col-0	Col8	22100000
Col-0	Col8	22600000
Col-0	Col8	22600000
Col-0	Col8	23100000
Col-0	Col8	23200000
Col-0	Col8	23200000
Col-0	Col8	24600000
Col-0	Col8	24900000
Col-0	Col8	24900000
Col-0	Col8	25100000
Col-0	Col8	25200000
Col-0	Col8	25200000
Col-0	Col8	25400000
Col-0	Col8	25800000
Col-0	Col8	26000000
Col-0	Col8	26300000
Col-0	Col8	26400000
Col-0	Col8	26500000
Col-0	Col8	27000000
Col-0	Col8	27600000
Col-0	Col8	27800000
Col-0	Col8	29000000
Col-0	Col8	29000000
Col-0	Col8	29500000
Col-0	Col8	29800000
Col-0	Col8	30500000
Col-0	Col8	31000000
Col-0	Col8	31600000
Col-0	Col8	32800000
Col-0	Col8	32800000
Col-0	Col8	33900000
Col-0	Col8	34000000
Col-0	Col8	34200000
Col-0	Col8	34300000
Col-0	Col8	34300000
Col-0	Col8	34400000
Col-0	Col8	34400000
Col-0	Col8	34800000
Col-0	Col8	35000000
Col-0	Col8	35400000
Col-0	Col8	35700000
Col-0	Col8	35800000
Col-0	Col8	36200000
Col-0	Col8	36500000
Col-0	Col8	36500000
Col-0	Col8	37200000
Col-0	Col8	37200000
Col-0	Col8	37300000
Col-0	Col8	37600000
Col-0	Col8	37900000
Col-0	Col8	37900000
Col-0	Col8	38000000
Col-0	Col8	38100000
Col-0	Col8	38300000
Col-0	Col8	38400000
Col-0	Col8	38400000
Col-0	Col8	38600000
Col-0	Col8	38700000
Col-0	Col8	38900000
Col-0	Col8	38900000
Col-0	Col8	38900000
Col-0	Col8	39400000
Col-0	Col8	39600000
Col-0	Col8	39700000
Col-0	Col8	39700000
Col-0	Col8	39700000
Col-0	Col8	39800000
Col-0	Col8	39900000
Col-0	Col8	41000000
Col-0	Col8	41300000
Col-0	Col8	41400000
Col-0	Col8	41600000
Col-0	Col8	41700000
Col-0	Col8	41700000
Col-0	Col8	41900000
Col-0	Col8	42000000
Col-0	Col8	42400000
Col-0	Col8	43000000
Col-0	Col8	43400000
Col-0	Col8	44500000
Col-0	Col9	17800000
Col-0	Col9	18500000
Col-0	Col9	18600000
Col-0	Col9	19200000
Col-0	Col9	19200000
Col-0	Col9	19200000
Col-0	Col9	19300000
Col-0	Col9	19300000
Col-0	Col9	19300000
Col-0	Col9	19600000
Col-0	Col9	19600000
Col-0	Col9	19800000
Col-0	Col9	19900000
Col-0	Col9	19900000
Col-0	Col9	20000000
Col-0	Col9	20100000
Col-0	Col9	20100000
Col-0	Col9	20100000
Col-0	Col9	20200000
Col-0	Col9	20300000
Col-0	Col9	20300000
Col-0	Col9	20400000
Col-0	Col9	20400000
Col-0	Col9	20500000
Col-0	Col9	20500000
Col-0	Col9	20600000
Col-0	Col9	20600000
Col-0	Col9	20700000
Col-0	Col9	20700000
Col-0	Col9	20700000
Col-0	Col9	20800000
Col-0	Col9	20800000
Col-0	Col9	20900000
Col-0	Col9	20900000
Col-0	Col9	21100000
Col-0	Col9	21100000
Col-0	Col9	21100000
Col-0	Col9	21300000
Col-0	Col9	21400000
Col-0	Col9	21400000
Col-0	Col9	21500000
Col-0	Col9	21700000
Col-0	Col9	21800000
Col-0	Col9	21800000
Col-0	Col9	21900000
Col-0	Col9	21900000
Col-0	Col9	21900000
Col-0	Col9	22100000
Col-0	Col9	22500000
Col-0	Col9	22600000
Col-0	Col9	22700000
Col-0	Col9	22700000
Col-0	Col9	22700000
Col-0	Col9	22700000
Col-0	Col9	22900000
Col-0	Col9	23000000
Col-0	Col9	23000000
Col-0	Col9	23000000
Col-0	Col9	23000000
Col-0	Col9	23100000
Col-0	Col9	23200000
Col-0	Col9	23300000
Col-0	Col9	23400000
Col-0	Col9	23400000
Col-0	Col9	23500000
Col-0	Col9	23600000
Col-0	Col9	23700000
Col-0	Col9	23800000
Col-0	Col9	23800000
Col-0	Col9	23800000
Col-0	Col9	23800000
Col-0	Col9	23800000
Col-0	Col9	24000000
Col-0	Col9	24000000
Col-0	Col9	24100000
Col-0	Col9	24100000
Col-0	Col9	24100000
Col-0	Col9	24200000
Col-0	Col9	24200000
Col-0	Col9	24300000
Col-0	Col9	24400000
Col-0	Col9	24500000
Col-0	Col9	24600000
Col-0	Col9	24700000
Col-0	Col9	24700000
Col-0	Col9	24700000
Col-0	Col9	24800000
Col-0	Col9	24800000
Col-0	Col9	24900000
Col-0	Col9	25000000
Col-0	Col9	25000000
Col-0	Col9	25000000
Col-0	Col9	26500000
Col-0	Col9	26500000
Col-0	Col9	27000000
Col-0	Col9	31600000
Col-0	Col9	36200000
Col-0	Col9	39200000
Col-0	Col9	42800000
Col-0	Col9	43200000
S15	S15-1	33700000
S15	S15-1	35100000
S15	S15-1	29200000
S15	S15-1	30200000
S15	S15-1	32000000
S15	S15-1	23900000
S15	S15-1	31200000
S15	S15-1	26400000
S15	S15-1	32800000
S15	S15-1	29200000
S15	S15-1	31000000
S15	S15-1	30700000
S15	S15-1	32600000
S15	S15-1	31100000
S15	S15-1	30700000
S15	S15-1	31200000
S15	S15-1	31700000
S15	S15-1	30600000
S15	S15-1	30600000
S15	S15-1	25500000
S15	S15-1	26200000
S15	S15-1	29900000
S15	S15-1	27800000
S15	S15-1	28400000
S15	S15-1	26000000
S15	S15-1	25700000
S15	S15-1	27200000
S15	S15-1	27900000
S15	S15-1	27800000
S15	S15-1	27200000
S15	S15-1	26000000
S15	S15-1	24000000
S15	S15-1	24900000
S15	S15-1	25500000
S15	S15-1	26100000
S15	S15-1	27500000
S15	S15-1	24600000
S15	S15-1	26100000
S15	S15-1	24700000
S15	S15-1	24200000
S15	S15-1	23000000
S15	S15-1	21800000
S15	S15-1	22300000
S15	S15-1	28500000
S15	S15-1	22600000
S15	S15-1	23500000
S15	S15-1	22100000
S15	S15-1	22900000
S15	S15-1	22600000
S15	S15-1	22300000
S15	S15-1	20900000
S15	S15-1	21100000
S15	S15-1	19100000
S15	S15-1	20000000
S15	S15-1	19000000
S15	S15-1	19800000
S15	S15-1	21000000
S15	S15-1	20600000
S15	S15-1	19300000
S15	S15-1	17400000
S15	S15-1	17000000
S15	S15-1	18700000
S15	S15-1	16300000
S15	S15-1	16200000
S15	S15-1	18000000
S15	S15-1	17000000
S15	S15-1	15900000
S15	S15-1	15500000
S15	S15-1	14900000
S15	S15-1	14600000
S15	S15-1	15100000
S15	S15-1	13700000
S15	S15-1	14600000
S15	S15-1	14200000
S15	S15-1	13400000
S15	S15-1	12300000
S15	S15-1	12800000
S15	S15-1	11300000
S15	S15-1	11800000
S15	S15-1	12600000
S15	S15-1	12300000
S15	S15-1	7570000
S15	S15-1	8750000
S15	S15-1	7620000
S15	S15-1	6530000
S15	S15-1	4990000
S15	S15-2	15200000
S15	S15-2	15600000
S15	S15-2	15700000
S15	S15-2	15400000
S15	S15-2	15500000
S15	S15-2	15100000
S15	S15-2	15800000
S15	S15-2	15500000
S15	S15-2	15500000
S15	S15-2	15200000
S15	S15-2	14000000
S15	S15-2	14800000
S15	S15-2	13700000
S15	S15-2	14500000
S15	S15-2	14200000
S15	S15-2	14500000
S15	S15-2	13700000
S15	S15-2	14600000
S15	S15-2	14400000
S15	S15-2	14000000
S15	S15-2	12600000
S15	S15-2	11800000
S15	S15-2	13200000
S15	S15-2	12100000
S15	S15-2	12600000
S15	S15-2	13200000
S15	S15-2	13100000
S15	S15-2	12300000
S15	S15-2	11700000
S15	S15-2	12300000
S15	S15-2	10700000
S15	S15-2	10300000
S15	S15-2	10500000
S15	S15-2	10400000
S15	S15-2	11200000
S15	S15-2	10600000
S15	S15-2	9740000
S15	S15-2	10900000
S15	S15-2	10700000
S15	S15-2	9920000
S15	S15-2	8380000
S15	S15-2	9180000
S15	S15-2	8790000
S15	S15-2	8040000
S15	S15-2	9390000
S15	S15-2	8960000
S15	S15-2	8390000
S15	S15-2	7910000
S15	S15-2	8550000
S15	S15-2	9320000
S15	S15-2	7370000
S15	S15-2	4060000
S15	S15-2	1440000
S15	S15-2	1710000
S15	S15-2	1560000
S15	S15-2	1780000
S15	S15-3	37100000
S15	S15-3	38000000
S15	S15-3	36100000
S15	S15-3	36800000
S15	S15-3	36500000
S15	S15-3	18200000
S15	S15-3	18300000
S15	S15-3	37600000
S15	S15-3	35600000
S15	S15-3	36900000
S15	S15-3	21300000
S15	S15-3	21800000
S15	S15-3	41500000
S15	S15-3	40900000
S15	S15-3	41900000
S15	S15-3	41900000
S15	S15-3	39400000
S15	S15-3	17800000
S15	S15-3	14400000
S15	S15-3	20600000
S15	S15-3	24700000
S15	S15-3	26500000
S15	S15-3	27700000
S15	S15-3	33100000
S15	S15-3	35600000
S15	S15-3	31300000
S15	S15-3	28900000
S15	S15-3	34800000
S15	S15-3	37000000
S15	S15-3	38500000
S15	S15-3	23900000
S15	S15-3	24900000
S15	S15-3	19700000
S15	S15-3	28200000
S15	S15-3	28400000
S15	S15-3	32500000
S15	S15-3	20600000
S15	S15-3	23900000
S15	S15-3	24200000
S15	S15-3	23400000
S15	S15-3	29100000
S15	S15-3	29800000
S15	S15-3	34600000
S15	S15-3	34000000
S15	S15-3	35700000
S15	S15-3	34400000
S15	S15-3	25000000
S15	S15-3	25700000
S15	S15-3	27300000
S15	S15-3	27300000
S15	S15-3	31300000
S15	S15-3	29100000
S15	S15-3	35500000
S15	S15-3	33400000
S15	S15-3	34700000
S15	S15-3	32500000
S15	S15-3	33400000
S15	S15-3	35900000
S15	S15-3	36800000
S15	S15-3	37200000
S15	S15-3	34000000
S15	S15-3	37200000
S15	S15-3	36700000
S15	S15-3	34500000
S15	S15-3	34100000
S15	S15-3	33600000
S15	S15-3	37000000
S15	S15-3	33800000
S15	S15-3	37900000
S15	S15-3	35200000
S15	S15-3	34800000
S15	S15-3	37100000
S15	S15-3	39300000
S15	S15-3	35600000
S15	S15-3	36100000
S15	S15-3	33300000
S15	S15-3	33800000
S15	S15-3	36400000
S15	S15-3	33600000
S15	S15-3	36100000
S15	S15-3	32200000
S15	S15-3	34500000
S15	S15-3	37100000
S15	S15-3	30600000
S15	S15-3	31000000
S15	S15-3	29100000
S15	S15-3	32900000
S15	S15-3	30500000
S15	S15-3	33300000
S15	S15-3	34300000
S15	S15-3	32800000
S15	S15-3	34200000
S15	S15-3	34000000
S15	S15-3	35900000
S15	S15-4	22900000
S15	S15-4	22500000
S15	S15-4	20900000
S15	S15-4	20700000
S15	S15-4	22000000
S15	S15-4	20200000
S15	S15-4	21600000
S15	S15-4	22900000
S15	S15-4	23400000
S15	S15-4	23700000
S15	S15-4	23400000
S15	S15-4	21500000
S15	S15-4	20700000
S15	S15-4	22300000
S15	S15-4	22500000
S15	S15-4	21200000
S15	S15-4	21000000
S15	S15-4	21600000
S15	S15-4	20600000
S15	S15-4	22400000
S15	S15-4	21800000
S15	S15-4	21800000
S15	S15-4	23700000
S15	S15-4	22100000
S15	S15-4	23700000
S15	S15-4	22500000
S15	S15-4	21000000
S15	S15-4	21700000
S15	S15-4	23100000
S15	S15-4	23200000
S15	S15-4	22100000
S15	S15-4	23500000
S15	S15-4	21400000
S15	S15-4	22400000
S15	S15-4	23100000
S15	S15-4	21300000
S15	S15-4	23100000
S15	S15-4	23400000
S15	S15-4	24200000
S15	S15-4	21800000
S15	S15-4	20700000
S15	S15-4	21700000
S15	S15-4	20600000
S15	S15-4	23300000
S15	S15-4	24000000
S15	S15-4	22900000
S15	S15-4	23100000
S15	S15-4	26600000
S15	S15-4	20900000
S15	S15-4	20400000
S15	S15-4	22400000
S15	S15-4	25800000
S15	S15-4	23400000
S15	S15-4	21600000
S15	S15-4	24700000
S15	S15-4	23100000
S15	S15-4	22100000
S15	S15-4	21800000
S15	S15-4	22700000
S15	S15-4	20400000
S15	S15-4	25600000
S15	S15-4	24700000
S15	S15-4	24700000
S15	S15-4	24500000
S15	S15-4	24100000
S15	S15-4	24300000
S15	S15-4	27300000
S15	S15-4	23200000
S15	S15-4	23100000
S15	S15-4	21200000
S15	S15-5	24600000
S15	S15-5	17300000
S15	S15-5	14300000
S15	S15-5	14300000
S15	S15-5	21000000
S15	S15-5	35700000
S15	S15-5	34800000
S15	S15-5	38000000
S15	S15-5	38300000
S15	S15-5	37900000
S15	S15-5	36800000
S15	S15-5	35500000
S15	S15-5	43400000
S15	S15-5	45600000
S15	S15-5	37000000
S15	S15-5	39400000
S15	S15-5	35300000
S15	S15-5	28700000
S15	S15-5	28800000
S15	S15-5	30100000
S15	S15-5	28500000
S15	S15-5	31500000
S15	S15-5	29800000
S15	S15-5	31200000
S15	S15-5	29700000
S15	S15-5	31000000
S15	S15-5	32200000
S15	S15-5	31300000
S15	S15-5	31700000
S15	S15-5	31900000
S15	S15-5	34400000
S15	S15-5	25300000
S15	S15-5	22800000
S15	S15-5	23200000
S15	S15-5	23200000
S15	S15-5	23900000
S15	S15-5	24400000
S15	S15-5	22500000
S15	S15-5	21800000
S15	S15-5	22600000
S15	S15-5	19000000
S15	S15-5	15400000
S15	S15-5	18400000
S15	S15-5	20700000
S15	S15-5	20200000
S15	S15-5	22000000
S15	S15-5	25300000
S15	S15-5	24100000
S15	S15-5	28800000
S15	S15-5	28300000
S15	S15-5	28700000
S15	S15-5	33000000
S15	S15-5	32000000
S15	S15-5	33400000
S15	S15-6	12600000
S15	S15-6	14900000
S15	S15-6	14000000
S15	S15-6	15100000
S15	S15-6	14600000
S15	S15-6	14000000
S15	S15-6	15200000
S15	S15-6	13600000
S15	S15-6	14400000
S15	S15-6	12600000
S15	S15-6	15500000
S15	S15-6	12900000
S15	S15-6	22900000
S15	S15-6	7700000
S15	S15-6	8710000
S15	S15-6	7680000
S15	S15-6	5700000
S15	S15-6	8110000
S15	S15-6	8040000
S15	S15-6	9260000
S15	S15-6	7890000
S15	S15-6	6280000
S15	S15-6	7330000
S15	S15-7	16100000
S15	S15-7	15600000
S15	S15-7	16900000
S15	S15-7	17800000
S15	S15-7	16400000
S15	S15-7	15900000
S15	S15-7	16100000
S15	S15-7	15900000
S15	S15-7	16500000
S15	S15-7	16600000
S15	S15-7	15600000
S15	S15-7	15900000
S15	S15-7	14900000
S15	S15-7	15900000
S15	S15-7	16300000
S15	S15-7	16000000
S15	S15-7	15200000
S15	S15-7	15800000
S15	S15-7	15600000
S15	S15-7	21800000
S15	S15-7	13800000
S15	S15-7	15200000
S15	S15-7	15200000
S15	S15-7	18500000
S15	S15-7	21600000
S15	S15-7	24000000
S15	S15-7	23900000
S15	S15-7	22000000
S15	S15-7	23300000
S15	S15-7	23300000
S15	S15-7	25400000
S15	S15-7	25900000
S15	S15-7	25400000
S15	S15-7	23100000
S15	S15-7	25000000
S15	S15-7	19900000
S15	S15-7	22000000
S15	S15-7	4110000
S15	S15-8	6710000
S15	S15-8	10600000
S15	S15-8	10700000
S15	S15-8	10200000
S15	S15-8	10300000
S15	S15-8	9750000
S15	S15-8	9750000
S15	S15-8	9860000
S15	S15-8	10000000
S15	S15-8	9900000
S15	S15-8	9550000
S15	S15-8	10000000
S15	S15-8	10000000
S15	S15-8	9930000
S15	S15-8	9440000
S15	S15-8	9760000
S15	S15-8	9650000
S15	S15-8	9710000
S15	S15-8	9740000
S15	S15-8	9190000
S15	S15-8	9130000
S15	S15-8	10100000
S15	S15-8	10100000
S15	S15-8	9940000
S15	S15-8	10500000
S15	S15-8	9790000
S15	S15-8	9670000
S15	S15-8	9820000
S15	S15-8	10000000
S15	S15-8	9920000
S15	S15-8	9760000
S15	S15-8	10600000
S15	S15-8	10100000
S15	S15-8	10500000
S15	S15-8	10400000
S15	S15-8	10200000
S15	S15-8	10300000
S15	S15-8	10100000
S15	S15-8	10200000
S15	S15-8	10100000
S15	S15-8	9880000
S15	S15-8	10100000
S15	S15-8	10300000
S15	S15-8	9870000
S15	S15-8	9710000
S15	S15-8	10200000
S15	S15-8	9860000
S15	S15-8	10400000
S15	S15-8	10300000
S15	S15-8	9780000
S15	S15-8	10300000
S15	S15-8	10400000
S15	S15-8	10300000
S15	S15-8	10100000
S15	S15-8	10300000
S15	S15-8	9870000
S15	S15-8	9970000
S15	S15-8	9270000
S15	S15-8	9930000
S15	S15-8	9530000
S15	S15-8	10200000
S15	S15-8	10300000
S15	S15-8	10500000
S15	S15-8	9240000
S15	S15-8	10100000
S15	S15-8	9350000
S15	S15-8	9670000
S15	S15-8	9880000
S15	S15-8	9980000
S15	S15-8	9290000
S15	S15-8	10000000
S15	S15-8	9790000
S15	S15-8	9610000
S15	S15-8	9890000
S15	S15-8	9280000
S15	S15-8	9910000
S15	S15-8	9830000
S15	S15-8	9690000
S15	S15-8	10300000
S15	S15-8	9780000
S15	S15-8	10400000
S15	S15-8	9750000
S15	S15-8	10000000
S15	S15-8	10200000
S15	S15-8	9720000
S15	S15-8	9890000
S15	S15-8	9690000
S15	S15-8	9830000
S15	S15-8	10200000
S15	S15-8	9940000
S15	S15-8	9900000
S15	S15-8	9840000
S15	S15-8	9950000
S15	S15-8	9840000
S15	S15-8	9680000
S15	S15-8	9890000
S15	S15-8	9930000
S15	S15-8	10100000
S15	S15-8	10400000
S15	S15-8	10000000
S15	S15-8	9460000
S15	S15-9	9070000
S15	S15-9	8120000
S15	S15-9	7070000
S15	S15-9	5210000
S15	S15-9	3920000
S15	S15-9	4050000
S15	S15-9	7100000
S15	S15-9	5930000
S15	S15-9	6520000
S15	S15-9	4090000
S15	S15-9	7410000
S15	S15-9	5340000
S15	S15-9	3230000
S15	S15-9	3070000
S15	S15-9	6560000
S15	S15-9	6450000
S15	S15-9	3730000
S15	S15-9	3660000
S15	S15-9	4610000
S15	S15-9	1270000
S15	S15-9	2960000
S15	S15-9	3590000
S15	S15-9	1800000
S15	S15-9	5270000
S15	S15-9	5400000
S15	S15-9	3620000
S15	S15-9	2900000
S15	S15-9	2490000
S15	S15-9	2330000
S15	S15-9	1340000
S15	S15-9	3560000
S15	S15-9	2950000
S15	S15-9	2840000
S15	S15-9	2100000
S15	S15-10	29100000
S15	S15-10	29100000
S15	S15-10	28600000
S15	S15-10	28400000
S15	S15-10	28400000
S15	S15-10	28200000
S15	S15-10	28100000
S15	S15-10	28100000
S15	S15-10	28100000
S15	S15-10	28000000
S15	S15-10	28000000
S15	S15-10	27700000
S15	S15-10	27600000
S15	S15-10	27600000
S15	S15-10	27600000
S15	S15-10	27500000
S15	S15-10	27500000
S15	S15-10	27500000
S15	S15-10	27400000
S15	S15-10	27400000
S15	S15-10	27400000
S15	S15-10	27300000
S15	S15-10	27300000
S15	S15-10	27200000
S15	S15-10	27200000
S15	S15-10	27200000
S15	S15-10	27200000
S15	S15-10	27100000
S15	S15-10	27100000
S15	S15-10	27000000
S15	S15-10	27000000
S15	S15-10	26900000
S15	S15-10	26800000
S15	S15-10	26700000
S15	S15-10	26700000
S15	S15-10	26600000
S15	S15-10	26500000
S15	S15-10	26500000
S15	S15-10	26500000
S15	S15-10	26500000
S15	S15-10	26400000
S15	S15-10	26400000
S15	S15-10	26400000
S15	S15-10	26300000
S15	S15-10	26300000
S15	S15-10	26300000
S15	S15-10	26100000
S15	S15-10	26000000
S15	S15-10	25900000
S15	S15-10	25900000
S15	S15-10	25900000
S15	S15-10	25900000
S15	S15-10	25800000
S15	S15-10	25800000
S15	S15-10	25600000
S15	S15-10	25200000
S15	S15-10	25200000
S15	S15-10	25000000
S15	S15-10	24900000
S15	S15-10	24400000
S15	S15-10	23200000
S15	S15-10	23100000
S15	S15-10	22900000
S15	S15-10	22900000
S15	S15-10	22900000
S15	S15-10	22700000
S15	S15-10	22600000
S15	S15-10	21100000
S15	S15-10	21000000
S15	S15-10	20900000
S15	S15-10	20900000
S15	S15-10	20500000
S15	S15-10	20000000
S15	S15-10	20000000
S15	S15-10	19800000
S15	S15-10	19800000
S15	S15-10	19600000
S15	S15-10	19200000
S15	S15-10	19200000
S15	S15-10	18800000
S15	S15-10	18600000
S15	S15-10	18300000
S15	S15-10	17900000
S15	S15-10	17600000
S15	S15-10	17500000
S15	S15-10	16700000
S15	S15-10	16500000
S15	S15-10	15900000
S15	S15-10	15900000
S15	S15-10	15500000
S15	S15-10	15000000
S15	S15-10	13200000
S15	S15-10	13100000
S15	S15-10	12800000
S15	S15-10	12300000
S15	S15-10	12300000
S15	S15-10	8790000
S15	S15-10	4870000
ktn1	ktn1-1	14400000
ktn1	ktn1-1	15600000
ktn1	ktn1-1	15900000
ktn1	ktn1-1	16600000
ktn1	ktn1-1	16600000
ktn1	ktn1-1	17200000
ktn1	ktn1-1	17600000
ktn1	ktn1-1	17700000
ktn1	ktn1-1	17800000
ktn1	ktn1-1	17900000
ktn1	ktn1-1	18400000
ktn1	ktn1-1	18500000
ktn1	ktn1-1	18500000
ktn1	ktn1-1	18500000
ktn1	ktn1-1	18900000
ktn1	ktn1-1	19000000
ktn1	ktn1-1	19000000
ktn1	ktn1-1	19500000
ktn1	ktn1-1	19600000
ktn1	ktn1-1	20200000
ktn1	ktn1-1	20700000
ktn1	ktn1-1	20800000
ktn1	ktn1-1	21100000
ktn1	ktn1-1	21200000
ktn1	ktn1-1	21200000
ktn1	ktn1-1	21500000
ktn1	ktn1-1	21600000
ktn1	ktn1-1	22000000
ktn1	ktn1-1	22000000
ktn1	ktn1-1	22000000
ktn1	ktn1-1	22100000
ktn1	ktn1-1	22400000
ktn1	ktn1-1	22600000
ktn1	ktn1-1	22700000
ktn1	ktn1-1	22700000
ktn1	ktn1-1	22800000
ktn1	ktn1-1	23100000
ktn1	ktn1-1	23100000
ktn1	ktn1-1	23400000
ktn1	ktn1-1	23400000
ktn1	ktn1-1	23400000
ktn1	ktn1-1	23700000
ktn1	ktn1-1	23700000
ktn1	ktn1-1	23900000
ktn1	ktn1-1	23900000
ktn1	ktn1-1	24000000
ktn1	ktn1-1	24000000
ktn1	ktn1-1	24100000
ktn1	ktn1-1	24300000
ktn1	ktn1-1	24500000
ktn1	ktn1-1	24500000
ktn1	ktn1-1	24600000
ktn1	ktn1-1	24700000
ktn1	ktn1-1	24700000
ktn1	ktn1-1	24700000
ktn1	ktn1-1	24800000
ktn1	ktn1-1	24800000
ktn1	ktn1-1	25100000
ktn1	ktn1-1	25100000
ktn1	ktn1-1	25400000
ktn1	ktn1-1	25700000
ktn1	ktn1-1	25700000
ktn1	ktn1-1	25800000
ktn1	ktn1-1	26000000
ktn1	ktn1-1	26000000
ktn1	ktn1-1	26000000
ktn1	ktn1-1	26200000
ktn1	ktn1-1	26200000
ktn1	ktn1-1	26200000
ktn1	ktn1-1	26300000
ktn1	ktn1-1	26300000
ktn1	ktn1-1	26300000
ktn1	ktn1-1	26400000
ktn1	ktn1-1	26500000
ktn1	ktn1-1	26900000
ktn1	ktn1-1	27300000
ktn1	ktn1-1	27400000
ktn1	ktn1-1	27500000
ktn1	ktn1-1	27500000
ktn1	ktn1-1	27600000
ktn1	ktn1-1	27900000
ktn1	ktn1-1	27900000
ktn1	ktn1-1	28000000
ktn1	ktn1-1	28000000
ktn1	ktn1-1	28100000
ktn1	ktn1-1	28400000
ktn1	ktn1-1	28600000
ktn1	ktn1-1	28800000
ktn1	ktn1-1	29000000
ktn1	ktn1-1	29200000
ktn1	ktn1-1	29400000
ktn1	ktn1-1	29400000
ktn1	ktn1-1	29600000
ktn1	ktn1-1	29700000
ktn1	ktn1-1	30600000
ktn1	ktn1-1	30700000
ktn1	ktn1-1	31100000
ktn1	ktn1-1	31200000
ktn1	ktn1-1	31900000
ktn1	ktn1-1	32000000
ktn1	ktn1-2	12900000
ktn1	ktn1-2	13200000
ktn1	ktn1-2	14300000
ktn1	ktn1-2	15200000
ktn1	ktn1-2	19000000
ktn1	ktn1-2	19700000
ktn1	ktn1-2	19900000
ktn1	ktn1-2	22700000
ktn1	ktn1-2	22800000
ktn1	ktn1-2	22900000
ktn1	ktn1-2	24200000
ktn1	ktn1-2	24500000
ktn1	ktn1-2	25700000
ktn1	ktn1-2	27100000
ktn1	ktn1-2	28500000
ktn1	ktn1-2	28800000
ktn1	ktn1-2	28900000
ktn1	ktn1-2	29000000
ktn1	ktn1-2	30800000
ktn1	ktn1-2	32400000
ktn1	ktn1-2	33000000
ktn1	ktn1-2	34100000
ktn1	ktn1-2	35400000
ktn1	ktn1-2	35800000
ktn1	ktn1-2	36400000
ktn1	ktn1-2	37300000
ktn1	ktn1-2	37800000
ktn1	ktn1-2	38200000
ktn1	ktn1-2	38500000
ktn1	ktn1-2	38500000
ktn1	ktn1-2	38600000
ktn1	ktn1-2	38900000
ktn1	ktn1-2	39300000
ktn1	ktn1-2	39400000
ktn1	ktn1-2	40400000
ktn1	ktn1-2	40600000
ktn1	ktn1-2	40700000
ktn1	ktn1-2	41200000
ktn1	ktn1-2	41900000
ktn1	ktn1-3	20500000
ktn1	ktn1-3	20600000
ktn1	ktn1-3	21600000
ktn1	ktn1-3	21600000
ktn1	ktn1-3	21600000
ktn1	ktn1-3	22000000
ktn1	ktn1-3	22200000
ktn1	ktn1-3	22400000
ktn1	ktn1-3	22600000
ktn1	ktn1-3	22600000
ktn1	ktn1-3	22800000
ktn1	ktn1-3	23000000
ktn1	ktn1-3	23100000
ktn1	ktn1-3	23100000
ktn1	ktn1-3	23300000
ktn1	ktn1-3	23600000
ktn1	ktn1-3	23600000
ktn1	ktn1-3	23700000
ktn1	ktn1-3	23700000
ktn1	ktn1-3	23700000
ktn1	ktn1-3	24000000
ktn1	ktn1-3	24000000
ktn1	ktn1-3	24000000
ktn1	ktn1-3	24100000
ktn1	ktn1-3	24100000
ktn1	ktn1-3	24300000
ktn1	ktn1-3	24300000
ktn1	ktn1-3	24400000
ktn1	ktn1-3	24400000
ktn1	ktn1-3	24500000
ktn1	ktn1-3	24500000
ktn1	ktn1-3	24500000
ktn1	ktn1-3	24600000
ktn1	ktn1-3	24600000
ktn1	ktn1-3	24600000
ktn1	ktn1-3	24700000
ktn1	ktn1-3	24800000
ktn1	ktn1-3	25100000
ktn1	ktn1-3	25100000
ktn1	ktn1-3	25300000
ktn1	ktn1-3	25600000
ktn1	ktn1-3	25700000
ktn1	ktn1-3	25700000
ktn1	ktn1-3	25800000
ktn1	ktn1-3	26000000
ktn1	ktn1-3	26000000
ktn1	ktn1-3	26000000
ktn1	ktn1-3	26100000
ktn1	ktn1-3	26100000
ktn1	ktn1-3	26200000
ktn1	ktn1-3	26200000
ktn1	ktn1-3	26200000
ktn1	ktn1-3	26300000
ktn1	ktn1-3	26300000
ktn1	ktn1-3	26500000
ktn1	ktn1-3	26600000
ktn1	ktn1-3	26600000
ktn1	ktn1-3	26700000
ktn1	ktn1-3	26800000
ktn1	ktn1-3	26800000
ktn1	ktn1-3	26800000
ktn1	ktn1-3	26900000
ktn1	ktn1-3	26900000
ktn1	ktn1-3	27000000
ktn1	ktn1-3	27000000
ktn1	ktn1-3	27100000
ktn1	ktn1-3	27100000
ktn1	ktn1-3	27100000
ktn1	ktn1-3	27100000
ktn1	ktn1-3	27200000
ktn1	ktn1-3	27300000
ktn1	ktn1-3	27300000
ktn1	ktn1-3	27300000
ktn1	ktn1-3	27300000
ktn1	ktn1-3	27500000
ktn1	ktn1-3	27600000
ktn1	ktn1-3	27700000
ktn1	ktn1-3	27700000
ktn1	ktn1-3	27700000
ktn1	ktn1-3	27800000
ktn1	ktn1-3	27900000
ktn1	ktn1-3	27900000
ktn1	ktn1-3	28000000
ktn1	ktn1-3	28100000
ktn1	ktn1-3	28100000
ktn1	ktn1-3	28100000
ktn1	ktn1-3	28100000
ktn1	ktn1-3	28600000
ktn1	ktn1-3	28800000
ktn1	ktn1-3	28800000
ktn1	ktn1-3	28800000
ktn1	ktn1-3	29100000
ktn1	ktn1-3	29100000
ktn1	ktn1-3	29400000
ktn1	ktn1-3	29700000
ktn1	ktn1-3	29700000
ktn1	ktn1-3	30100000
ktn1	ktn1-3	30200000
ktn1	ktn1-3	30300000
ktn1	ktn1-3	30600000
ktn1	ktn1-4	11000000
ktn1	ktn1-4	11100000
ktn1	ktn1-4	11400000
ktn1	ktn1-4	11700000
ktn1	ktn1-4	12300000
ktn1	ktn1-4	12400000
ktn1	ktn1-4	12500000
ktn1	ktn1-4	13000000
ktn1	ktn1-4	13400000
ktn1	ktn1-4	13400000
ktn1	ktn1-4	13500000
ktn1	ktn1-4	13600000
ktn1	ktn1-4	13700000
ktn1	ktn1-4	14100000
ktn1	ktn1-4	14200000
ktn1	ktn1-4	14500000
ktn1	ktn1-4	15000000
ktn1	ktn1-4	15100000
ktn1	ktn1-4	15400000
ktn1	ktn1-4	15400000
ktn1	ktn1-4	15500000
ktn1	ktn1-4	15500000
ktn1	ktn1-4	15500000
ktn1	ktn1-4	15800000
ktn1	ktn1-4	15900000
ktn1	ktn1-4	16000000
ktn1	ktn1-4	16100000
ktn1	ktn1-4	16100000
ktn1	ktn1-4	16400000
ktn1	ktn1-4	16400000
ktn1	ktn1-4	16600000
ktn1	ktn1-4	16600000
ktn1	ktn1-4	16700000
ktn1	ktn1-4	16700000
ktn1	ktn1-4	16900000
ktn1	ktn1-4	16900000
ktn1	ktn1-4	17000000
ktn1	ktn1-4	17000000
ktn1	ktn1-4	17200000
ktn1	ktn1-4	17200000
ktn1	ktn1-4	17300000
ktn1	ktn1-4	17300000
ktn1	ktn1-4	17400000
ktn1	ktn1-4	17600000
ktn1	ktn1-4	17800000
ktn1	ktn1-4	17800000
ktn1	ktn1-4	18200000
ktn1	ktn1-4	18300000
ktn1	ktn1-4	18400000
ktn1	ktn1-4	18700000
ktn1	ktn1-4	18800000
ktn1	ktn1-4	20900000
ktn1	ktn1-4	29400000
ktn1	ktn1-5	18400000
ktn1	ktn1-5	18200000
ktn1	ktn1-5	19500000
ktn1	ktn1-5	18500000
ktn1	ktn1-5	16800000
ktn1	ktn1-5	16600000
ktn1	ktn1-5	16700000
ktn1	ktn1-5	17700000
ktn1	ktn1-5	17000000
ktn1	ktn1-5	17200000
ktn1	ktn1-5	15700000
ktn1	ktn1-5	15500000
ktn1	ktn1-5	16100000
ktn1	ktn1-5	15900000
ktn1	ktn1-5	9630000
ktn1	ktn1-5	9390000
ktn1	ktn1-5	3400000
ktn1	ktn1-5	1760000
ktn1	ktn1-5	3080000
ktn1	ktn1-5	3550000
ktn1	ktn1-5	7290000
ktn1	ktn1-5	3250000
ktn1	ktn1-5	16900000
ktn1	ktn1-5	16600000
ktn1	ktn1-5	16100000
ktn1	ktn1-5	15800000
ktn1	ktn1-5	15100000
ktn1	ktn1-5	14800000
ktn1	ktn1-5	13800000
ktn1	ktn1-5	13400000
ktn1	ktn1-5	11900000
ktn1	ktn1-5	13900000
ktn1	ktn1-5	14100000
ktn1	ktn1-5	14000000
ktn1	ktn1-5	12100000
ktn1	ktn1-5	12900000
ktn1	ktn1-5	14000000
ktn1	ktn1-5	14900000
ktn1	ktn1-5	15300000
ktn1	ktn1-5	15800000
ktn1	ktn1-5	16000000
ktn1	ktn1-5	14900000
ktn1	ktn1-5	15200000
ktn1	ktn1-5	14900000
ktn1	ktn1-5	15000000
ktn1	ktn1-5	14800000
ktn1	ktn1-5	14400000
ktn1	ktn1-5	14900000
ktn1	ktn1-5	15400000
ktn1	ktn1-5	14800000
ktn1	ktn1-5	15200000
ktn1	ktn1-5	14800000
ktn1	ktn1-5	14800000
ktn1	ktn1-5	13200000
ktn1	ktn1-5	12400000
ktn1	ktn1-5	13500000
ktn1	ktn1-5	12800000
ktn1	ktn1-5	13400000
ktn1	ktn1-5	14000000
ktn1	ktn1-5	15500000
ktn1	ktn1-5	14400000
ktn1	ktn1-5	14700000
ktn1	ktn1-5	14600000
ktn1	ktn1-5	14000000
ktn1	ktn1-5	12700000
ktn1	ktn1-5	12800000
ktn1	ktn1-5	14300000
ktn1	ktn1-5	14600000
ktn1	ktn1-5	15100000
ktn1	ktn1-5	14700000
ktn1	ktn1-5	14400000
ktn1	ktn1-5	16000000
ktn1	ktn1-5	18100000
ktn1	ktn1-5	16000000
ktn1	ktn1-5	15900000
ktn1	ktn1-5	16800000
ktn1	ktn1-5	16400000
ktn1	ktn1-5	14900000
ktn1	ktn1-5	15900000
ktn1	ktn1-5	15200000
ktn1	ktn1-5	15600000
ktn1	ktn1-5	15700000
ktn1	ktn1-5	17800000
ktn1	ktn1-5	16600000
ktn1	ktn1-5	16300000
ktn1	ktn1-5	15500000
ktn1	ktn1-5	16600000
ktn1	ktn1-5	15900000
ktn1	ktn1-5	15600000
ktn1	ktn1-5	14700000
ktn1	ktn1-5	15400000
ktn1	ktn1-5	15900000
ktn1	ktn1-6	22000000
ktn1	ktn1-6	18800000
ktn1	ktn1-6	18600000
ktn1	ktn1-6	17700000
ktn1	ktn1-6	17700000
ktn1	ktn1-6	16600000
ktn1	ktn1-6	16500000
ktn1	ktn1-6	16300000
ktn1	ktn1-6	16200000
ktn1	ktn1-6	16200000
ktn1	ktn1-6	16000000
ktn1	ktn1-6	16000000
ktn1	ktn1-6	15700000
ktn1	ktn1-6	15600000
ktn1	ktn1-6	15500000
ktn1	ktn1-6	15200000
ktn1	ktn1-6	14900000
ktn1	ktn1-6	14900000
ktn1	ktn1-6	14800000
ktn1	ktn1-6	14700000
ktn1	ktn1-6	14600000
ktn1	ktn1-6	14400000
ktn1	ktn1-6	14000000
ktn1	ktn1-6	13900000
ktn1	ktn1-6	13800000
ktn1	ktn1-6	13400000
ktn1	ktn1-6	12800000
ktn1	ktn1-6	12400000
ktn1	ktn1-6	12100000
ktn1	ktn1-6	11800000
ktn1	ktn1-6	11800000
ktn1	ktn1-6	11400000
ktn1	ktn1-6	11000000
ktn1	ktn1-6	10900000
ktn1	ktn1-6	10000000
ktn1	ktn1-6	9900000
ktn1	ktn1-6	9770000
ktn1	ktn1-6	8680000
ktn1	ktn1-6	8630000
ktn1	ktn1-6	8490000
ktn1	ktn1-6	8410000
ktn1	ktn1-6	7960000
ktn1	ktn1-6	7810000
ktn1	ktn1-6	7670000
ktn1	ktn1-6	7560000
ktn1	ktn1-6	6800000
ktn1	ktn1-6	5880000
ktn1	ktn1-6	5630000
ktn1	ktn1-6	5360000
ktn1	ktn1-6	5120000
ktn1	ktn1-6	3110000
ktn1	ktn1-6	1120000
ktn1	ktn1-6	755000
ktn1	ktn1-7	9880000
ktn1	ktn1-7	9080000
ktn1	ktn1-7	7540000
ktn1	ktn1-7	7710000
ktn1	ktn1-7	7630000
ktn1	ktn1-7	6070000
ktn1	ktn1-7	5510000
ktn1	ktn1-7	6780000
ktn1	ktn1-7	1590000
ktn1	ktn1-7	6650000
ktn1	ktn1-7	17900000
ktn1	ktn1-7	15000000
ktn1	ktn1-7	24400000
ktn1	ktn1-7	18500000
ktn1	ktn1-7	23400000
ktn1	ktn1-7	25800000
ktn1	ktn1-7	25900000
ktn1	ktn1-7	22700000
ktn1	ktn1-7	26400000
ktn1	ktn1-7	21100000
ktn1	ktn1-7	11500000
ktn1	ktn1-7	24700000
ktn1	ktn1-7	22700000
ktn1	ktn1-7	28000000
ktn1	ktn1-7	5670000
ktn1	ktn1-7	17700000
ktn1	ktn1-7	17500000
ktn1	ktn1-7	2780000
ktn1	ktn1-7	12100000
ktn1	ktn1-7	8230000
ktn1	ktn1-7	14500000
ktn1	ktn1-7	16400000
ktn1	ktn1-7	2640000
ktn1	ktn1-7	13300000
ktn1	ktn1-7	1730000
ktn1	ktn1-7	8930000
ktn1	ktn1-7	15900000
ktn1	ktn1-7	2510000
ktn1	ktn1-7	9890000
ktn1	ktn1-7	25400000
ktn1	ktn1-7	8770000
ktn1	ktn1-7	17800000
ktn1	ktn1-7	8120000
ktn1	ktn1-7	11800000
ktn1	ktn1-7	6940000
ktn1	ktn1-7	16500000
ktn1	ktn1-7	8920000
ktn1	ktn1-7	14700000
ktn1	ktn1-7	16700000
ktn1	ktn1-7	18200000
ktn1	ktn1-7	15100000
ktn1	ktn1-7	13900000
ktn1	ktn1-7	16900000
ktn1	ktn1-7	15600000
ktn1	ktn1-7	5930000
ktn1	ktn1-7	12800000
ktn1	ktn1-7	16800000
ktn1	ktn1-7	18300000
ktn1	ktn1-7	3460000
ktn1	ktn1-7	12300000
ktn1	ktn1-7	16800000
ktn1	ktn1-7	12700000
ktn1	ktn1-7	17000000
ktn1	ktn1-7	13400000
ktn1	ktn1-7	14700000
ktn1	ktn1-7	14900000
ktn1	ktn1-7	10700000
ktn1	ktn1-7	4120000
ktn1	ktn1-7	6650000
ktn1	ktn1-7	2970000
ktn1	ktn1-7	11500000
ktn1	ktn1-7	15800000
ktn1	ktn1-7	16700000
ktn1	ktn1-7	6970000
ktn1	ktn1-7	10300000
ktn1	ktn1-7	2730000
ktn1	ktn1-7	22600000
ktn1	ktn1-7	23100000
ktn1	ktn1-7	22000000
ktn1	ktn1-7	21600000
ktn1	ktn1-7	26000000
ktn1	ktn1-7	26600000
ktn1	ktn1-7	24300000
ktn1	ktn1-7	23100000
ktn1	ktn1-7	21600000
ktn1	ktn1-7	24000000
ktn1	ktn1-7	30600000
ktn1	ktn1-7	23300000
ktn1	ktn1-7	23700000
ktn1	ktn1-7	25300000
ktn1	ktn1-9	9580000
ktn1	ktn1-9	9190000
ktn1	ktn1-9	8530000
ktn1	ktn1-9	8940000
ktn1	ktn1-9	7970000
ktn1	ktn1-9	8200000
ktn1	ktn1-9	9060000
ktn1	ktn1-9	8820000
ktn1	ktn1-9	8830000
ktn1	ktn1-9	9210000
ktn1	ktn1-9	8310000
ktn1	ktn1-9	8780000
ktn1	ktn1-9	9690000
ktn1	ktn1-9	9000000
ktn1	ktn1-9	9520000
ktn1	ktn1-9	10300000
ktn1	ktn1-9	7160000
ktn1	ktn1-9	6100000
ktn1	ktn1-9	7660000
ktn1	ktn1-9	8210000
ktn1	ktn1-9	6400000
ktn1	ktn1-9	7300000
ktn1	ktn1-9	9510000
ktn1	ktn1-9	8790000
ktn1	ktn1-9	9600000
ktn1	ktn1-9	8660000
ktn1	ktn1-9	7430000
ktn1	ktn1-9	8490000
ktn1	ktn1-9	6910000
ktn1	ktn1-9	6490000
ktn1	ktn1-9	6580000
ktn1	ktn1-9	7390000
ktn1	ktn1-9	8420000
ktn1	ktn1-9	7730000
ktn1	ktn1-9	7320000
ktn1	ktn1-9	7130000
ktn1	ktn1-9	6800000
ktn1	ktn1-9	6560000
ktn1	ktn1-9	6990000
ktn1	ktn1-9	5920000
ktn1	ktn1-9	6660000
ktn1	ktn1-9	6910000
ktn1	ktn1-9	6850000
ktn1	ktn1-9	7480000
ktn1	ktn1-9	7750000
ktn1	ktn1-9	6450000
ktn1	ktn1-9	5100000
ktn1	ktn1-9	7550000
ktn1	ktn1-9	9120000
ktn1	ktn1-9	5730000
ktn1	ktn1-9	6480000
ktn1	ktn1-9	5670000
ktn1	ktn1-9	7970000
ktn1	ktn1-9	7580000
ktn1	ktn1-9	7250000
ktn1	ktn1-9	6990000
ktn1	ktn1-9	6830000
ktn1	ktn1-9	6140000
ktn1	ktn1-9	6600000
ktn1	ktn1-9	7660000
ktn1	ktn1-9	6630000
ktn1	ktn1-9	6560000
ktn1	ktn1-9	6470000
ktn1	ktn1-9	6050000
ktn1	ktn1-9	6550000
ktn1	ktn1-9	7200000
ktn1	ktn1-9	6530000
ktn1	ktn1-9	6290000
ktn1	ktn1-9	6360000
ktn1	ktn1-10	12300000
ktn1	ktn1-10	17700000
ktn1	ktn1-10	14400000
ktn1	ktn1-10	15200000
ktn1	ktn1-10	11800000
ktn1	ktn1-10	12700000
ktn1	ktn1-10	14300000
ktn1	ktn1-10	343000
ktn1	ktn1-10	12500000
ktn1	ktn1-10	1920000
ktn1	ktn1-10	15800000
ktn1	ktn1-10	18000000
ktn1	ktn1-10	15700000
ktn1	ktn1-10	15900000
ktn1	ktn1-10	16700000
ktn1	ktn1-10	5550000
ktn1	ktn1-10	3140000
ktn1	ktn1-10	891000
ktn1	ktn1-10	1430000
ktn1	ktn1-10	7540000
ktn1	ktn1-10	21400000
ktn1	ktn1-10	21800000
ktn1	ktn1-10	20400000
ktn1	ktn1-10	17500000
ktn1	ktn1-10	19300000
ktn1	ktn1-10	15900000
ktn1	ktn1-10	2330000
ktn1	ktn1-10	12200000
ktn1	ktn1-10	8790000
ktn1	ktn1-10	13000000
ktn1	ktn1-10	22100000
ktn1	ktn1-10	22500000
ktn1	ktn1-10	22400000
ktn1	ktn1-10	4900000
[truncated: 688 more rows]

## Sheet: Figure 6G
Figure 6G–Source Data 1
Fig6G_PollenTubeSpeed
					Col-0 x pAct11-RFP		ktn1 x pAct11-RFP
					papillae	stigmas	papillae	stigmas
			R1		10	2	10	2
			R2		11	2	12	2
			R3		6	1	6	1
			R4		12	2	13	2
			R5		8	1	9	1
			sum		47	8	50	8
Col-0 x pAct11RFP
	time after pollination	t	t+1	t+2	t+3	t+4	t+5	t+6	t+7	t+8	t+9	t+10
	R1_C_S1_GP1	3.634	4.653	8.151	10.481	14.256	16.862	18.089	22.506	28.531	29.137	30.835
	R1_C_S1_GP2	4.799	12.212	16.582	17.416	21.727	29.392	36.633	40.71	41.491	44.444	45.051
	R1_C_S1_GP3	3.266	5.975	9.52	10.235	15.446	21.705	25.379	29.232	38.506	40.68	44.15
	R1_C_S1_GP4	3.954	4.732	9.307	11.382	12.001	20.309	22.602	29.578	31.422	36.341	37.871
	R1_C_S1_GP5	3.79	5.291	9.012	14.475	19.762	24.479	25.349	31	34.717	35.181	35.662
	R1_C_S1_GP6	3.083	4.732	7.58	10.324	14.653	18.518	23.906	25.244	28.912	31.303	32.119
	R1_C_S1_GP1	3.25	5.515	8.531	11.375	14.08	17.304	20.29	25.291	31.186	34.352	37.37
	R1_C_S1_GP2	3.201	5.676	7.135	10.901	16.891	19.41	24.192	31.097	38.368	42.891	46.671
	R1_C_S1_GP3	4.225	5.24	11.614	15.07	17.154	18.631	20.524	22.915	30.096	35.687	39.992
	R1_C_S1_GP4	3.346	3.79	4.653	6.31	7.128	8.203	14.469	17.895	19.803	25.113	26.027
	R2_C_S1_GP1	2.777	3.575	5.859	9.906	14.883	19.403	21.213	26.484	32.184	42.371	47.469
	R2_C_S1_GP2	2.298	3.066	3.346	4.831	5.056	5.975	11.935	16.016	22.439	28.928	33.15
	R2_C_S1_GP3	2.777	2.996	5.077	9.106	12.367	16.067	19.868	24.728	25.777	28.037	35.083
	R2_C_S1_GP4	3.393	6.251	10.09	13.609	19.259	23.697	27.97	30.747	38.382	38.768	38.969
	R2_C_S1_GP5	3.25	4.072	6.856	10.855	17.082	19.198	23.751	24.18	24.288	26.279	26.543
	R2_C_S1_GP6	2.538	3.201	3.59	6.825	9.328	15.274	18.933	22.768	28.301	31.637	32.963
	R2_C_S2_GP1	3.79	4.237	7.827	11.117	13.341	18.304	18.712	20.843	26.348	30.295	33.696
	R2_C_S2_GP2	2.18	4.831	5.75	12.014	14.531	21.032	25.473	29.967	32.276	32.714	32.945
	R2_C_S2_GP3	3.455	5.38	7.752	8.334	14.625	18.193	23.245	27.433	32.233	33.564	38.833
	R2_C_S2_GP4	4.137	5.859	6.175	9.564	16.823	20.726	22.499	25.58	25.721	28.388	29.576
	R2_C_S2_GP5	3.083	6.7	8.871	10.494	14.9	19.678	22.801	27.142	28.043	28.759	29.43
	R3_C_S1_GP1	3.5	7.016	9.943	13.996	16.282	20.87	21.457	25.742	27.305	31.349	35.533
	R3_C_S1_GP2	2.68	5.251	9.857	12.617	18.404	21.91	22.363	22.38	22.994	24.265	24.95
	R3_C_S1_GP3	3.59	5.291	8.458	9.801	11.818	15.802	18.098	21.952	24.521	25.906	30.789
	R3_C_S1_GP4	2.538	4.162	5.75	8.203	11.263	15.648	19.054	23.078	29.929	35.48	38.341
	R3_C_S1_GP5	3.706	3.914	5.448	7.468	14.068	17.937	21.366	26.303	31.555	34.17	39.674
	R3_C_S1_GP6	3.634	8.203	8.721	13.714	17.378	21.81	24.185	26.355	32.744	38.145	39.119
	R4_C_S1_GP1	2.538	4.831	4.877	7.031	9.983	13.217	15.139	19.12	23.942	27.035	31.549
	R4_C_S1_GP2	3.217	3.79	5.24	8.001	10.99	17.13	21.152	24.566	30.234	34.003	40.434
	R4_C_S1_GP3	3.706	4.596	6.045	12.835	15.726	18.834	23.889	26.266	30.822	33.313	38.086
	R4_C_S1_GP4	3.25	5.554	9.733	15.051	19.201	24.984	30.265	35.83	42.105	48.863	55.834
	R4_C_S1_GP5	2.275	5.859	10.474	14.627	17.617	19.92	24.529	25.521	29.647	34.698	39.679
	R4_C_S1_GP6	3.083	4.02	4.072	5.36	5.759	8.13	11.161	15.641	20.429	26.651	32.339
	R4_C_S1_GP7	3.393	5.38	7.425	11.332	14.34	19.14	24.118	30.232	33.82	38.479	43.205
	R4_C_S1_GP8	2.62	3.066	4.372	7.7	11.71	13.454	18.138	22.763	26.244	29.583	33.92
	R4_C_S1_GP9	3.706	7.373	10.823	16.404	21.449	26.844	30.127	34.401	36.885	43.217	46.159
	R4_C_S2_GP1	3.314	5.685	8.431	13.811	17.788	23.434	26.665	33.765	37.131	40.517	46.776
	R4_C_S2_GP2	3.455	3.967	4.42	5.291	7.79	11.788	17.549	22.342	26.619	31.847	34.842
	R4_C_S2_GP3	2.996	3.79	4.918	7.259	12.912	16.893	20.934	27.215	28.888	35.503	37.884
	R5_C_S1_GP1	4.732	4.8	5.855	10.191	12.97	19.727	20.367	22.049	22.599	24.968	28.653
	R5_C_S1_GP2	2.538	3.515	3.727	5.334	7.678	10.907	15.177	20.026	23.046	28.608	31.916
	R5_C_S1_GP3	2.62	4.886	6.072	8.782	10.485	10.654	11.391	13.637	14.388	22.81	28.382
	R5_C_S1_GP4	3.314	3.634	7.65	7.827	9.951	13.574	15.875	18.679	22.837	26.114	30.186
	R5_C_S1_GP5	2.18	5.977	8.237	12.098	16.773	22.891	23.17	25.517	24.794	32.451	38.96
	R5_C_S1_GP6	2.996	6.573	7.748	9.684	13.698	18.793	23.341	29.504	34.187	39.679	41.063
	R5_C_S1_GP7	3.954	4.596	6.476	7.001	7.332	10.92	15.242	20.953	26.372	27.029	29.166
	R5_C_S1_GP8	2.943	5.85	9.572	12.987	19.27	21.128	21.813	28.596	33.356	37.514	41.917
mean		3.24902	4.97888	6.91713	9.238	12.2696	16.0742	18.297	22.3701	25.1974	29.8966	33.7804		papillae	stigmas
ecart-type		0.611449	1.09774	1.78212	2.55751	4.23995	5.09397	4.4475	5.30572	6.35512	6.08215	5.84551		47	8
sem		0.21618	0.388109	0.630075	0.904216	1.49905	1.80099	1.57243	1.87586	2.24687	2.15036	2.0667
ktn1 x pAct11RFP
	time after pollination	t	t+1	t+2	t+3	t+4	t+5	t+6	t+7	t+8	t+9	t+10
	R1_k_S1_GP1	4.072	12.439	15.853	20.587	23.588	27.973	30.447	34.338	35.363	38.902	41.756
	R1_k_S1_GP2	4.5	10.42	15.603	21.535	25.991	33.251	37.95	40.146	46.28	48.451	49.521
	R1_k_S1_GP3	3.139	7.475	14.352	20.422	26.684	34.126	37.617	37.838	43.946	46.418	52.086
	R1_k_S2_GP1	3.79	6.859	10.012	14.883	18.022	25.586	31.053	38.69	44.675	50.049	54.348
	R1_k_S2_GP2	3.5	7.827	14.502	20.771	27.066	34.888	43.93	51.572	58.601	63.739	69.091
	R1_k_S2_GP3	3.634	5.409	10.124	15.357	21.28	27.628	34.771	41.714	50.555	58.924	65.29
	R1_k_S2_GP4	4.225	5.886	11.186	14.537	22.86	29.733	36.605	47.005	53.417	61.728	68.976
	R1_k_S2_GP5	3.677	6.91	10.065	13.52	18.475	23.662	27.753	35.697	41.057	47.049	52.286
	R1_k_S2_GP6	3.575	10.804	17.846	25.427	31.619	37.695	45.599	47.229	53.031	58.857	61.371
	R1_k_S2_GP7	3.066	4.95	11.924	21.896	30.99	38.333	48.36	57.084	63.345	67.053	77.411
	R2_k_S1_GP1	4.162	8.751	11.431	16.511	20.635	25.966	31.125	38.122	44.663	50.923	57.333
	R2_k_S1_GP2	3.706	9.156	12.949	17.37	21.169	24.686	29.581	35.835	44.753	50.666	57.325
	R2_k_S1_GP3	3.25	9.847	14.712	18.833	22.057	28.223	34.106	40.18	48.898	57.005	64.804
	R2_k_S1_GP4	3.967	12.264	17.592	19.882	24.651	27.906	33.898	38.236	47.539	56.515	65.767
	R2_k_S1_GP5	2.996	9.204	13.784	17.976	22.141	26.447	30.673	35.354	43.723	45.102	58.598
	R3_k_S2_GP4	2.62	6.786	10.033	13.412	19.143	20.382	28.966	34.537	41.914	48.939	52.657
	R2_k_S2_GP1	4.42	7.411	15.906	19.255	22.846	22.779	27.774	35.119	42.056	47.561	53.611
	R2_k_S2_GP2	4.237	10.804	15.882	19.451	24.856	30.224	34.761	42.025	47.754	52.155	54.717
	R2_k_S2_GP3	3.25	7.914	12.127	18.596	25.986	31.928	37.318	41.575	43.011	44.231	47.508
	R2_k_S2_GP4	3.914	5.363	10.08	14.757	20.068	26.599	33.984	37.847	44.81	51.802
	R2_k_S2_GP5	2.6	6.451	9.663	14.551	19.569	24.061	28.769	34.934	41.388	46.423	56.081
	R2_k_S2_GP6	2.943	5.676	11.976	17.78	23.634	27.107	29.743	37.591	41.703	46.476	56.903
	R3_k_S1_GP1	3.59	7.587	13.311	18.175	23.809	31.329	38.301	46.055	53.331	57.703	67.473
	R3_k_S1_GP2	3.79	8.658	13.017	16.591	21.231	20.79	25.944	38.664	46.029	51.054	59.997
	R3_k_S2_GP1	3.455	10.508	13.764	19.214	22.681	29.744	33.889	40.559	48.013	53.785	61.834
	R3_k_S2_GP2	3.013	4.162	9.123	13.87	18.628	23.871	29.478	34.338	42.074	51.083	55.042
	R3_k_S2_GP3	4.42	9.065	14.352	19.069	21.814	28.304	31.691	34.699	39.551	51.386	52.311
	R3_k_S2_GP4	2.62	6.786	10.033	13.412	19.143	20.382	28.966	34.537	41.914	48.939	52.657
	R4_k_S1_GP1	3.393	6.428	10.356	13.884	17.599	23.267	28.824	35.1	43.109	48.809	51.712
	R4_k_S1_GP2	2.538	3.217	5.077	10.711	14.502	19.256	24.736	31.296	36.654	42.009	50.318
	R4_k_S1_GP3	4.732	9.152	12.388	15.817	20.652	24.223	28.37	33.521	37.794	44.729	48.47
	R4_k_S2_GP1	3.914	8.282	13.845	22.384			41.954	50.872	58.136	65.188	71.553
	R4_k_S2_GP2	3.083	5.554	6.54	15.946	23.092	30.071	36.21			51.72	59.526
	R4_k_S2_GP3	3.804	10.22	15.741			35.647	43.639	51.812	56.608	67.322	71.236
	R4_k_S2_GP4	3.25	6.573	12.092	19.795	31.322			53.444	60.819	69.389	76.19
	R4_k_S2_GP5	3.5	9.204	13.854	19.748	27.935	38.556			66.81	73.18	82.752
	R4_k_S2_GP6	3.25	8.475	14.295	21.679			37.947	47.516	53.207	54.206	57.367
	R4_k_S2_GP7	3.25	7.827	15.682	23.432	33.046	44.645			65.405	75.415	79.68
	R4_k_S2_GP8	3.706	9.051	14.154	20.899	30.341	38.553			62.671	71.017	79.832
	R4_k_S2_GP9	3.9	9.244	14.292	22.7	30.105			51.578	60.693	71.441	77.181
	R4_k_S2_GP10	3.79	11.276	19.175	25.363	32.682			42.274	55.504	59.831	64.579
	R5_k_S1_GP1	2.18	5.24	9.205	12.516	16.202	19.971	24.247	29.326	34.382	37.895	41.625
	R5_k_S1_GP2	3.575	6.472	20.509	24.09	28.439	32.538	38.317	41.63	47.113	52.568	56.847
	R5_k_S1_GP3	3.954	7.966	10.532	23.776	27.508	32.035	42.12	43.259	48.874	52.378	55.651
	R5_k_S1_GP4	4.237	4.831	7.128	14.14	19.976	23.9	27.464	29.599	36.849	38.382	40.572
	R5_k_S1_GP5	3.266	10.74	14.198	18.452	23.184	27.089	31.735	39.283	43.188	46.523	50.22
	R5_k_S2_GP1	3.575	7.82	11.888	16.022	20.651	24.953	28.691	30.687	35.363	40.054	44.811
	R5_k_S2_GP2	3.967	8.975	13.704	18.554	23.52	28.816	35.048	39.974	40.431	42.901	48.481
	R5_k_S2_GP3	3.967	6.581	10.759	14.08	16.565	22.111	27.193	30.109	35.141	39.295	42.715
	R5_k_S2_GP4	2.925	5.36	8.751	11.412	16.723	21.945	26.88	31.738	34.491	42.772	49.496
moyennemean		3.55774	7.8772	12.7073	18.0212	23.2911	28.2484	33.3279	39.6639	47.0742	52.7988	58.5218
ecart-type		0.55916	2.12771	3.12392	3.70773	4.69467	5.8332	5.87718	6.85923	8.69258	9.71383	10.8107		papillae	stigmas
sem		0.197693	0.752261	1.10447	1.31088	1.65982	2.06235	2.0779	2.4251	3.07329	3.43436	3.82216		50	8
T.test		0.0108923	1.06831e-10	1.0776e-14	2.81047e-18	7.15511e-17	2.27943e-14	2.86215e-17	8.23409e-19	5.00578e-20	1.75566e-20	9.87692e-21

## Sheet: Figure 6H
Figure 6H–Source Data 1
Fig6H_PollenTubeSpeed
Comparison S13-S15-xxt1xxt2
			length
		replicate	time after pollination	t	t+1	t+2	t+3	t+4	t+5	t+6	t+7	t+8	t+9	t+10
		R1	R1_S13__S1_GP1	3.927	6.328	8.97	12.01	13.413	18.31	20.161	23.875	27.053	31.059	32.446
	en t+1 pp	R1	R1_S13__S1_GP2	1.34	6.072	7.201	11.307	12.757	13.008	14.316	16.163	17.935	19.634	20.057
51	pap	R1	R1_S13__S1_GP3	3.25	6.204	8.886	13.606	17.504	18.851	21.021	25.098	28.933	35.109	38.463
7	stig	R1	R1_S13__S1_GP4	5.145	7.304	7.758	16.209	16.517	19.435	21.552	25.955	27.085	32.495	37.409
		R1	R1_S13__S1_GP5	3.455	4.225	6.402	10.376	14.478	17.457	20.311	22.744	26.601	31.308	35.908
		R1	R1_S13__S1_GP6	4.292	5.655	8.771	12.417	16.047	20.627	22.653	24.271	25.173	26.503	29.023
		R1	R1_S13__S1_GP7	1.95	3.266	4.225	7.179	13.323	19.474	22.966	29.758	34.011	37.269	43.211
		R1	R1_S13__S2_GP1	3.515	7.216	11.919	17.095	24.509		27.562	33.133	45.856	46.096	46.61
		R1	R1_S13__S2_GP2	2.055	6.769	8.76	12.554	18.163		25.121	29.16	30.78	31.388	30.786
		R1	R1_S13__S2_GP3	3.066	10.296	13.388	18.236		30.154	35.521	36.022	37.176	38.191	39.468
		R1	R1_S13__S2_GP4	3.217	5.24	12.994	18.375		30.118	29.946	32.165	32.626	33.391	34.484
		R2	S13_S1_GP1	2.055	5.759	8.506	11.055	17.053	23.301	25.557	30.597	36.259	42.667	50.868
		R2	S13_S1_GP2	3.084	4.36	10.222	15.314	19.181	22.769	27.772	34.088	36.669	38.4
		R2	S13_S1_GP3	2.777	4.237	8.324	12.902	15.439	19.476	24.724	28.386	34.722	36.885	39.74
		R2	S13_S1_GP4	2.758	5.525	10.122	14.49	14.972	17.979	20.058	22.998	29.198	32.113	38.143
		R2	S13_S1_GP5	2.62	3.515	4.36	4.961	8.011	10.823	15.109	18.157	22.529	26.792	30.375
		R2	S13_S1_GP6	2.013	2.298	3.346	3.79	4.237	6.716	12.002	17.626	22.673	25.129	26.97
		R2	S13_S1_GP7	3.634	4.562	4.55	5.563	5.859	6.045	9.492	13.526	17.593	18.362	19.153
		R2	S13_S1_GP8	3.25	3.967	6.045	7.814	10.862	14.482	20.622	25.185	29.426	33.571	36.476
		R2	S13_S1_GP9	2.298	3.25	4.162	4.875	6.132	11.257	14.826	22.713	27.023	29.971	31.039
		R2	S13_S1_GP10	2.344	3.927	7.321	11.527	16.856	19.47	22.971	24.19	25.702	25.979	26.587
		R2	S13_S1_GP11	2.62	3.066	3.515	4.653	5.814	6.41	7.216	12.621	20.746	26.57	30.809
		R2	S13_S2_GP1	3.083	3.967	5.975	7.861	10.818	12.713	13.285	15.081	16.356	17.358	21.707
		R2	S13_S2_GP2	3.706	3.927	4.732	5.36	6.385	7.814	9.053	10.764	12.734	13.975	21.199
		R2	S13_S2_GP3	4.111	5.077	7.994	9.036	9.884	10.344	11.449	11.527	14.708	14.954	18.859
		R2	S13_S2_GP4	3.914	4.799	5.966	6.402	7.001	8.222	8.775	9.447	11.169	12.34	14.109
		R2	S13_S2_GP5	3.393	3.79	4.831	5.75	5.139	6.023	6.451	6.939	12.904	22.582	25.004
		R2	S13_S2_GP6	3.393	4.95	7.425	8.877	10.329	10.626	10.69	13.325	27.014	27.427	29.362
		R2	S13_S2_GP7	2.18	3.066	5.993	8.635	11.1	14.848	15	15.029	15.302	15.844	17.408
		R3	S13_S1_GP1	1.028	2.298	5.61	8.751	11.372	14.788	26.519	27.381	27.907	27.714	30.078
		R3	S13_S1_GP2	2.366	2.907	5.291	9.307	11.372	13.188	23.127	26.954	27.121	28.906	30.078
		R3	S13_S1_GP3	2.475	5.786	12.143	21.531	19.676	25.872	29.098	35.165	35.944	44.056	49.317
		R3	S13_S2_GP1	3.25	8.05	12.77	16.008	18.008	19.668	20.263	20.84	21.204	21.361	22.831
		R3	S13_S2_GP2	2.777	7.183	10.916	20.672	26.905	33.753	36.404	38.01	40.284	40.41	41.125
		R3	S13_S2_GP3	2.344	5.676	11.627	17.167	20.564	31.018	36.142	39.813	46.41	46.382	48.856
		R3	S13_S2_GP4	2.18	5.525	7.418	10.012	17.076	23.383	31.112	41.149	44.524	48.51	49.359
		R3	S13_S2_GP5	2.055	2.68	3.914	7.807	15.006	18.67	22.016	27.44	31.448	33.654	34.964
		R3	S13_S2_GP6	2.344	4.875	5.38	10.277	13.467	13.884	16.476	17.913	19.47	22.389	24.681
		R3	S13_S2_GP7	2.945	4.619	10.381	16.042	24.671	32.163	34.377	39.325	39.814	40.147	40.217
		R3	S13_S2_GP8	3.217	7.147	13.274	15.379	17.501	17.535	17.988	18.503	18.55	19.117	19.249
		R3	S13_S2_GP9	2.298	3.634	8.047	13.103	19.883	29.991	34.089	34.096	36.734	37.237	37.735
		R3	S13_S2_GP10	2.996	4.237	8.966	15.25	19.798	20.01	21.614	23.065	24.102	25.037	25.143
		R3	S13_S2_GP11	2.538	4.336	9.618	14.493	20.09	20.964	26.244	27.784	29.575	29.682	30.303
		R3	S13_S3_GP1	1.838	3.914	8.131	12.246	22.032	28.631	31.936	37.875	44.462	55.44	59.291
		R3	S13_S3_GP2	1.75	2.996	7.216	11.958	17.456	22.42	22.952	23.482	24.481	25.157	25.942
		R3	S13_S3_GP3	2.275	4.95	9.154	17.052	23.468	33.186	38.9	35.907	38.017	39.11	44.51
		R3	S13_S3_GP4	2.796	2.996	6.692	10.385	16.347	22.6	28.307	34.473	38.193	39.233	41.008
		R3	S13_S3_GP5	2.943	4.952	6.692	13.329	16.868	20.755	23.411	26.896	25.543	28.456	28.573
		R3	S13_S3_GP6	2.538	3.201	7.267	12.566	19.848	23.782	25.866	27.902	28.025	30.337	31.502
		R3	S13_S3_GP7	1.34	1.657	2.777	6.581	11.352	16.552	21.521	22.854	26.913	28.516	28.946
		R3	S13_S3_GP8	2.081	4.875	6.31	10.2	16.308	20.284	22.918	29.956	30.49	35.097	37.466
			mean	2.76116	4.72767	7.69131	11.5362	14.9153	18.7724	22.1071	25.2417	28.3366	30.7708	32.9369
			ecart-type	0.799134	1.66066	2.77687	4.38783	5.53472	7.52441	8.13509	8.67757	8.93758	9.44909	9.88178
			sem	0.302044	0.627671	1.04956	1.65844	2.09193	2.84396	3.07478	3.27981	3.37809	3.57142	3.73496
